1 **Research Reports article**

2

3 ***In silico* transcriptomics identifies FDA-approved drugs and biological pathways**  
4 **for protection against cisplatin-induced hearing loss**

5

6 Pezhman Salehi<sup>1#</sup>, Marisa Zallocchi<sup>1#</sup>, Sarath Vijayakumar<sup>1</sup>, Madeleine Urbanek<sup>1</sup>,  
7 Kimberlee P. Giffen<sup>2</sup>, Yuju Li<sup>1</sup>, Santanu Hati<sup>1</sup>, Jian Zuo<sup>1\*</sup>

8 <sup>1</sup>Department of Biomedical Sciences, School of Medicine, Creighton University, Omaha,  
9 NE 68178.

10 <sup>2</sup>Department of Neuroscience and Regenerative Medicine, Medical College of Georgia,  
11 Augusta University/ University of Georgia Medical Partnership, Athens, GA.

12

13 #Equal author contribution

14 \*Corresponding author: [jianzuo@creighton.edu](mailto:jianzuo@creighton.edu)

15 **Short title:** Drugs and pathways for the protection of hearing

16 **Keywords:** Connectivity map, transcriptomic profiling, niclosamide, cisplatin, noise,  
17 hearing loss

18

19 **Significant Statement:**

20 Employing the Connectivity Map as our *in silico* transcriptomic screening strategy we  
21 identified FDA-approved drugs and biological pathways for protection against cisplatin-  
22 induced hearing loss.

23 **Abstract:**

24 Acquired hearing loss is a major health problem that affects 5-10% of the world  
25 population. However, there are no FDA-approved drugs for the treatment or prevention  
26 of hearing loss. Employing the Connectivity Map (CMap) that contains >54,000  
27 compounds, we performed an unbiased *in silico* screen using the transcriptomic profiles  
28 of cisplatin-resistant and -sensitive cancer cell lines. Pathway enrichment analysis  
29 identified gene-drug targets for which 30 candidate drugs were selected with potential to  
30 confer protection against cisplatin-induced ototoxicity. In parallel, transcriptomic analysis  
31 of a cisplatin-treated cochlear-derived cell line identified common enriched pathway  
32 targets. We subsequently tested these top 30 candidate compounds, 15 (50%) of which  
33 are FDA-approved for other indications, and 26 (87%) of which were validated for their  
34 protective effects in either a cochlear-derived cell line or zebrafish lateral line neuromasts,  
35 thus confirming our *in silico* transcriptomic approach. Among these top compounds,  
36 niclosamide, a salicylanilide drug approved by the FDA for treating tapeworm infections  
37 for decades, protected from cisplatin- and noise-induced hearing loss in mice. Finally,  
38 niclosamide and ezetimibe (an Nrf2 agonist) exerted synergistic protection against  
39 cisplatin-ototoxicity in zebrafish, validating the Nrf2 pathway as part of niclosamide's  
40 mechanism of action. Taken together, employing the CMap, we identified multiple  
41 pathways and drugs against cisplatin ototoxicity and confirmed that niclosamide can  
42 effectively be repurposed as an otoprotectant for future clinical trials against cisplatin- and  
43 noise-induced hearing loss.

## 44 INTRODUCTION

45 Platinum-based chemotherapy is a standard of care for various types of cancers,  
46 including ovarian, lung, testicular, and head and neck carcinoma (1, 2). Cisplatin, one of  
47 the most effective platinum compounds, causes permanent hearing loss in 40-60% of  
48 treated cancer patients (3-8). To reduce cisplatin damage to the inner ear cochlear cells,  
49 various therapeutic strategies including usage of antioxidants, anti-inflammatory agents,  
50 calcium channel blockers, kinase inhibitors, heat shock proteins, and thiol compounds as  
51 chemical deactivators have been used in previous studies (3-8). For example, sodium  
52 thiosulfate (STS), is effective in protecting hearing in pediatric patients with localized  
53 hepatoblastoma who received cisplatin chemotherapy; however, STS acts as a cisplatin  
54 chelator and is ineffective in protecting against cisplatin-induced hearing loss (CIHL) in  
55 patients with other types of cancers (8). Additionally, recent studies have utilized large-  
56 scale drug screens in cochlear-derived cell lines, zebrafish lateral line, or mouse cochlear  
57 explants to identify novel otoprotective compounds such as kenpaullone, and ORC-13661  
58 (5, 8-10). To date, however, no drugs have been approved by the Food and Drug  
59 Administration (FDA) for protection against acquired hearing loss.

60 A promising research strategy to identify novel otoprotectant compounds is to learn from  
61 cisplatin-resistant cancer cells and try to induce the same defense mechanisms in  
62 cochlear cells. Taking advantage of a recently developed Connectivity Map (CMap)  
63 including the L1000CDS (LINCS) and Genomics and Drugs Integrated Analysis (GDA)  
64 databases (11-14), we performed *in silico* screens by connecting mechanisms of cellular  
65 resistance with therapeutic compounds associated with those biological mechanisms.  
66 The CMap consists of transcriptomic profiles of a variety of cell lines, of which many have

67 been treated with pharmacological agents or genetic manipulations (e.g., CRISPR  
68 genomic editing). We reasoned that transcriptomic profiles favoring cisplatin resistance  
69 in the cancer cell lines should link to many drugs in the broad chemical space that are  
70 likely to induce transcriptional profiles that mimic the cisplatin-resistant phenotype, thus  
71 identifying drugs that may have novel therapeutic use for the treatment of cisplatin toxicity  
72 within the cochlea, as long as these repurposed drugs do not interfere with cisplatin's  
73 cancer killing ability. In addition to drug identification, these transcriptomic *in silico*  
74 screens explore diverse biological pathways associated with cisplatin resistance in an  
75 unbiased manner. There are several successful studies using the CMap, including a  
76 recent study in the hearing field focusing on heat shock protein activators to treat  
77 aminoglycoside ototoxicity (9) and others repurposing existing drugs for SARS-CoV2  
78 treatment (9, 15, 16).

79 In this study, we utilized transcriptomic profiles of cisplatin-resistant cancer cell lines to  
80 perform *in silico* screens, including CMap and gene set enrichment analysis (GSEA), to  
81 discover drug- and pathway-gene targets and identify compounds with otoprotective  
82 potential. Bulk RNA-seq analysis of a cisplatin-treated cochlear-derived cell line (HEI-  
83 OC1) and GSEA identified multiple common biological pathways involved in CIHL.  
84 Testing of the top 30 candidate compounds showed protective effects in HEI-OC1 cells  
85 *in vitro* and zebrafish lateral line neuromasts *in vivo* against CIHL, confirming our *in silico*  
86 screen. Niclosamide, as a top candidate and FDA-approved drug for intestinal worm  
87 infections for decades, exhibits protection against cisplatin-induced cell death *in vitro* and  
88 hair cell (HC) death in both zebrafish and mouse experimental models *in vivo*.  
89 Furthermore, we demonstrated that niclosamide also had protective effects against noise-

90 induced hearing loss (NIHL), likely targeting common molecular pathways in CIHL and  
91 not interfering with cisplatin antineoplastic ability. Finally, we observed a synergistic  
92 otoprotective effect when niclosamide was used in combination with ezetimibe, an FDA-  
93 approved drug for the treatment of hypercholesterolemia, suggesting the possibility of a  
94 more effective multi-drug treatment for the prevention of hearing loss. Additionally, HPLC  
95 analysis, treatment of cancer cell lines *in vitro* with cisplatin and niclosamide, and previous  
96 studies in xenograft mouse tumor models have demonstrated that niclosamide does not  
97 interfere with cisplatin's efficacy as a chemotherapeutic agent (18). Taken together, our  
98 study highlights the general use of transcriptomic *in silico* screens to identify novel  
99 therapeutics and biological pathways.

## 100 RESULTS

101 Given that HCs in the inner ear are highly sensitive to cisplatin toxicity (1-8), our *in silico*  
102 approach aimed to identify small molecules capable of inducing a transcriptomic profile  
103 that could confer resistance to CIHL. For this purpose, we used publicly available RNA-  
104 seq datasets from the GEO and identified nine RNA-seq studies investigating cisplatin  
105 resistance in several cancer cell lines. In each of these studies, the transcriptomic profiles  
106 of sensitive parental cell lines were compared to those of resistant counterparts (**Figure**  
107 **1-table supplement 1**). These nine studies were analyzed using the NCBI's GEO2R tool  
108 (<https://www.ncbi.nlm.nih.gov/geo/geo2r/>) from which we obtained differentially  
109 expressed gene (DEG) lists. To identify compounds that will mimic the cisplatin-resistant  
110 transcriptomic profiles, we subsequently uploaded the DEGs from each study into the  
111 LINCS and GDA databases. Combined, these two CMap databases contain more than  
112 50,000 compounds with their corresponding transcript perturbation profiles from various

113 cancer cell lines. Our CMap database search identified more than 500 unique small  
114 molecules associated with the cisplatin-resistant phenotype. **Figure 1** (blue-shaded box)  
115 summarizes our transcriptomic-based *in silico* approach.

116 In parallel to our drug screening approach, we also aimed to identify enriched signaling  
117 pathways associated with cisplatin resistance in the nine RNA-seq datasets. Each DEG  
118 list was uploaded into ShinyGO v0.66 for GSEA (17). From a total of 4,559 upregulated  
119 and 5,141 downregulated genes, the analysis identified 30 upregulated and 14  
120 downregulated enriched signaling pathways annotated in the KEGG database (**Figure**  
121 **2A** and **Figure 2-figure supplement 1**). Among the up-regulated pathways, we found  
122 the toll-like receptor, TNF, T-cell receptor, JAK-STAT, IL-17, ErbB, and chemokine  
123 signaling pathways. Additionally, the significantly down-regulated pathways included  
124 mTOR and protein processing pathways. The up- and down-regulated genes (653 and  
125 354 genes respectively) annotated in the enriched pathways identified from GSEA were  
126 identified as pathway-gene targets for further analysis. **Figure 1** (red-shaded box)  
127 summarizes our pathway analysis approach.

128 We then compared the drug-gene targets (from our drug screening) to the pathway-gene  
129 targets to rank the top compounds that may modulate the activity of specific biological  
130 pathways, and thus confer resistance to cisplatin toxicity. The drug-gene targets of each  
131 compound were retrieved from the integrated LINCS (iLINCS) portal. These drug-gene  
132 targets were then sorted into discrete up- and down-regulated gene sets and compared  
133 to the differentially expressed pathway-gene targets to rank their potential for cisplatin  
134 resistance. The top drug candidates had the greatest overlap with the genes of GSEA-  
135 identified pathways. The top 30 compounds were selected for further validation, among

136 which 15 were FDA-approved drugs (**Figure 1**). All 30 compounds (i.e. perhexiline  
137 maleate, salermide, triptolide, prothionamide, etc.) were shown to hit at least one  
138 gene/pathway, with some drugs overlapping with more than 50 implicated genes and  
139 multiple pathways (**Figure 2B**). Niclosamide, for example, affected 20 upregulated and 3  
140 downregulated genes in multiple pathways.

#### 141 **Transcriptomic analysis of HEI-OC1 cells treated with cisplatin**

142 To validate the relevance of cisplatin resistance in cancer cell line to CIHL, we examined  
143 the transcriptional changes associated with cisplatin treatment using the HEI-OC1 cell  
144 line derived from postnatal day 7 mouse cochleae, which has been widely used for  
145 otoprotection screenings (5, 18). Bulk RNA-seq analysis of HEI-OC1 cells exposed to  
146 cisplatin revealed differentially expressed genes despite a high degree of correlation  
147 among the cisplatin-treated and control cells (Pearson's correlation coefficient > 0.91)  
148 (**Figure 2-figure supplement 2A**). We identified 2,728 and 1,638 genes that were  
149 significantly down- or up-regulated in the cisplatin-treated HEI-OC1 cells compared to the  
150 untreated controls ( $P < 0.05$ , fold change  $> |1.0|$ ) (**Figure 2-figure supplement 2B**). GSEA  
151 of differentially expressed genes in cisplatin-treated HEI-OC1 cells identified down-  
152 regulated KEGG pathways that were conversely up-regulated in the cisplatin-resistant  
153 cancer cell lines, such as the ErbB, Jak-STAT and Toll-like receptor signaling pathways,  
154 highlighting potential pathways to target for protection against cisplatin ototoxicity in  
155 cochlear cells (**Figure 1** (gray box), **Figure 2A**, **Figure 2-figure supplement 2C-E**, and  
156 **Figure 2-table supplement 2**). These independent analyses corroborate our *in silico*  
157 screens using transcriptomic profiles of cisplatin-resistant/-sensitive cancer cell lines and  
158 drug-induced genetic perturbations to identify drugs and pathways to protect from CIHL.

159 **Validation of top candidate drugs in HEI-OC1 cells *in vitro* and zebrafish lateral line**  
160 **neuromasts *in vivo***

161 To provide direct experimental evidence for our transcriptomic *in silico* screening, we  
162 used HEI-OC1 cells to validate our top 30 identified candidate drugs in an assay similar  
163 to our previous drug screening (5). Caspase activity was measured using Caspase-Glo  
164 3/7 assay, as a reverse indicator of cell survival/viability. The dose responses of caspase  
165 activity for each of the 30 drug candidates were measured at various concentrations  
166 ranging from 0.002  $\mu\text{M}$  to 40  $\mu\text{M}$  (**Figure 3-figure supplement 1**). **Figure 3A** depicts the  
167 lowest percentage of caspase activity compared to cisplatin alone treated cells. Of the 30  
168 compounds identified in our *in silico* screening, 20 compounds significantly reduced  
169 caspase 3/7 activity compared to controls.

170 We simultaneously tested the 30 compounds in a zebrafish *in vivo* model for cisplatin  
171 ototoxicity (19). Compound concentrations ranged from 0.002  $\mu\text{M}$  to 13.3  $\mu\text{M}$ . HC counts  
172 were compared to those of zebrafish treated exclusively with 300  $\mu\text{M}$  cisplatin (as 0%  
173 protection) or E3 water in 0.1% DMSO (as 100% protection) to obtain the percentage  
174 protection for each compound (**Figure 3B-3C**). The drug candidates were ranked based  
175 on the most effective protection against cisplatin damage (**Figure 3B** and **Figure 3-**  
176 **supplement figure 2**). Of the 30 compounds, 21 showed significant levels of protection  
177 compared to zebrafish treated with cisplatin alone. When comparing the compounds  
178 showing protection in our zebrafish model (**Fig. 3B**) with the ones tested in HEI-OC1 cells  
179 (**Fig. 3A**), 15 were common in both assays and 26 (87%) in either assay. Moreover, 7 of  
180 these common compounds were FDA approved for other indications (**Figure 3-figure**  
181 **supplement 3**).



182 These experimental results strongly validated that cisplatin resistance drug-gene-  
183 pathways identified in cancer cell lines are also conserved in CIHL and therefore  
184 demonstrated the general utility of transcriptomic *in silico* drug screens.

### 185 **Niclosamide attenuates cisplatin-induced hearing loss in FVB/NJ mice *in vivo***

186 After our initial screening, niclosamide emerged as a potential top hit candidate based on  
187 several factors: 1) HEI-OC1 cells treated with niclosamide reached 0% caspase activity  
188 (full protection) at a dose of ~4.4  $\mu\text{M}$  (**Figure 3A**); 2) niclosamide provided one of the  
189 highest levels of protection (~50%) at the lowest concentration tested (0.002  $\mu\text{M}$ ) in  
190 zebrafish neuromasts (**Figures 3B-C, F**); 3) niclosamide had a relatively low calculated  
191  $\text{IC}_{50}$  of 0.28  $\mu\text{M}$  compared to other tested compounds tested in HEI-OC1 cells (**Figure 3D**  
192 and **Figure 3-figure supplement 1**); 4) in comparison to several other hits (including  
193 thioridazine, salermide, and dimercaprol, **Figure 3-figure supplement 1**), niclosamide  
194 had a wider therapeutic window, demonstrating considerable levels of protection at over  
195 80% of the tested doses (**Figure 3D** and **Figure 3-figure supplement 1**); 5) niclosamide  
196 was not cytotoxic within a wide range of concentrations (**Figure 3E**); 6) niclosamide  
197 showed levels of protection comparable to kenpaullone but better than four other  
198 benchmark compounds including sodium thiosulfate, ebselen, dexamethasone, and N-  
199 acetylcysteine (**Figure 3-figure supplement 4**) (5), and 7) niclosamide is a FDA-  
200 approved drug for the treatment of tapeworm infections for four decades with multiple  
201 clinical trials for cancer and COVID indications (NCT04753619, NCT02687009,  
202 NCT03123978, NCT04753619).

203 Thus, we decided to move forward with the characterization of niclosamide's protective  
204 effect in a mouse model for CIHL. For this purpose, mice were randomly assigned to four

205 different treatments: control (vehicle), cisplatin-alone (cisplatin + vehicle), cisplatin +  
206 niclosamide, and niclosamide-alone. Niclosamide (10 mg/kg for 4 consecutive days) and  
207 cisplatin (30 mg/kg single day divided into two doses) were injected IP. The results of the  
208 ABR tests at day-5 post cisplatin injection showed a statistically significant difference  
209 between the hearing threshold shifts of cisplatin-niclosamide treated mice at 8, 16, and  
210 32 kHz ( $P < 0.05$ ) when compared to cisplatin only group (**Figure 4A** and **Figure 4-figure**  
211 **supplement 1**). The ABR thresholds of niclosamide-only treated mice were not  
212 significantly different from saline-injected controls. These *in vivo* ABR results show that  
213 niclosamide protects against CIHL in mice.

214 The ABR wave-1 amplitude represents the summed activity of the cochlear nerve, and  
215 therefore, an informative measure of auditory synapse function. We measured mean  
216 wave-1 amplitudes at 8, 16, 32, and 40 kHz, in the control and niclosamide-treated mice  
217 before cisplatin injection and at day-5 post-cisplatin injection. Wave I amplitude shifts from  
218 the 85 dB SPL stimuli were compared between groups using a two-factor ANOVA (group  
219 x frequency). At day 5 post-treatment, the two-factor ANOVA revealed a significant two-  
220 way interaction of group x stimulus level at 32 kHz and the post-hoc Tukey's test revealed  
221 that the cisplatin-niclosamide treated group had a reduced wave I amplitude shift  
222 compared to cisplatin-only group (**Figures 4B** and **Figure 4-figure supplement 2**).  
223 These ABR wave-1 amplitude results provide further evidence of niclosamide's  
224 otoprotection *in vivo*.

225 We further quantified the number of outer HCs (OHCs) at the mid-basal region, the most  
226 protected frequency region shown by ABR threshold and wave I amplitude  
227 measurements. Representative images of cochlear HCs are displayed in **Figure 4C**.

228 Quantitative data for HC count at the mid-basal region are displayed in **Figure 4D**. The  
229 one-way ANOVA revealed a significant group effect ( $P < 0.05$ ). The post-hoc test revealed  
230 that while inner HC survival was not affected, the cisplatin-niclosamide group had more  
231 OHC survival than the cisplatin alone group in the mid-basal region (**Figure 4D**). These  
232 ABR and HC count data together, confirmed that niclosamide protects OHCs against  
233 cisplatin damage.

#### 234 **Niclosamide protects NMDA-induced HC loss in zebrafish *in vivo***

235 Since CIHL and NIHL share mechanistic commonalities (23, 24), we examined whether  
236 niclosamide had any protective effects in a zebrafish model for HC excitotoxicity (25). As  
237 previously described, neuromast HC numbers were reduced after exposure to 300  $\mu\text{M}$   
238 NMDA (22). Conversely, post-treatment of the zebrafish exposed to 300  $\mu\text{M}$  NMDA with  
239 0.002  $\mu\text{M}$  or 0.0183  $\mu\text{M}$  of niclosamide resulted in significantly increased HC survival  
240 (**Figure 5A**). These zebrafish excitotoxicity results indicate that niclosamide may also  
241 protect against NIHL.

#### 242 **Niclosamide diminishes NIHL in adult FVB/NJ mice *in vivo***

243 We further investigated niclosamide's therapeutic effects against NIHL in FVB/NJ mice.  
244 We first injected the mice with 10 mg/kg niclosamide via IP once per day for four  
245 consecutive days, starting one day before noise exposure, the day of the noise exposure,  
246 and two more days after noise exposure. Control animals received vehicle injections on  
247 the same schedule. Noise exposure was administered at 8-16 kHz at 100 dB SPL for 2  
248 hrs. Noise-induced ABR threshold shifts were obtained by subtraction of the pre-exposure  
249 from the post-exposure thresholds. Two-way ANOVA followed by Sidak's multiple  
250 comparison test revealed that the niclosamide-noise exposed group had lower threshold

251 shifts than noise-exposed group across most of the tested frequencies (16 kHz, 32 kHz  
252 and 63 kHz) at day 14 (**Figure 5B** and **Figure 4-figure supplement 1**). These results  
253 demonstrate that niclosamide also protects against NIHL in mice and suggest that its  
254 action is independent of cisplatin inactivation.

255 To determine whether niclosamide prevents NIHL by protecting OHCs, we measured the  
256 DPOAE amplitudes at the different  $f_2$  frequencies with L2 levels ranging from 10 to 70 dB  
257 SPL (**Figure 5C**). In the noise-niclosamide group, DPOAE amplitudes were not  
258 significantly higher than the noise-saline group at day 15 post-noise exposure. A two-  
259 factor ANOVA (group x frequency) was used to compare pre-exposure amplitudes to day  
260 15 amplitudes. The ANOVA revealed no significant two-way group x frequency interaction  
261 indicating that the OHC function is similar between all groups and suggesting that  
262 niclosamide's protective effect against noise could be due to prevention of synaptopathy  
263 between inner HCs and cochlear nerves. To test our hypothesis, mean ABR wave-I  
264 amplitudes at 8, 16, 32, and 40 kHz were measured at day 15 post-noise exposure.  
265 Amplitudes from the 10 to 90 dB SPL stimulus intensity were compared between groups  
266 in the pre-noise test using a two-factor ANOVA (group x stimulus level), and no group  
267 differences were detected (data not shown). At day 15, only the 50-90 dB SPL stimulus  
268 levels were used because many of the subjects had no responses below 50 dB SPL.  
269 Results from these experiments showed that the wave I amplitudes from the niclosamide-  
270 noise group were increased at all the noise stimulus tested, with 80 and 90 dB SPL  
271 showing significant differences. The two-way ANOVA revealed a significant interaction of  
272 group x stimulus level ( $P < 0.001$ ). The Tukey's post-hoc revealed that the niclosamide-  
273 noise group had higher amplitudes at 80 and 90 dB SPL compared to the noise-exposed

274 group (**Figure 5D**). The ABR wave-I amplitude results showed that cochlear nerve activity  
275 in the noise-niclosamide group was comparable to the aged-matched controls, with no  
276 statistically significant difference between these groups, thus providing evidence of  
277 niclosamide's protection from synaptopathy.

278 To assess the protection of the ribbon synapses, the cochlear samples were  
279 immunostained with CtBP2. Representative images of the mouse ribbon synapses at 16  
280 kHz are displayed in **Figure 5E**. Quantitative data for ribbon synapses at 16 kHz are  
281 displayed in **Figure 5F**. T-test statistical analyses revealed that the niclosamide-noise  
282 group had more synaptic ribbons than the saline-noise group (**Figure 5F**). The frequency  
283 region of 16 kHz was used for CtBP2 ribbon count because it has been shown that ribbons  
284 are more abundant in this frequency region (26).

285 Taken together, our results showed that niclosamide protects against CIHL and NIHL in  
286 both zebrafish and mice *in vivo*. Its protection in mice is prominently represented by OHC  
287 survival in CIHL (**Figure 4C-D**) and ribbon synapse protection in NIHL (**Fig. 5E-F**).  
288 However, it is very likely that niclosamide might be also exerting its protective effect on  
289 other cochlear cells.

## 290 **Niclosamide shows synergistic effects with the Nrf2 agonist ezetimibe in zebrafish**

291 Given the multiple pathways that niclosamide affects (20, 27-31, and **Figure 2B**) and the  
292 key role of Nrf2 in regulating reactive oxygen species (ROS) in cisplatin toxicity (**Figure**  
293 **2-figure supplement 1**, 31), we reasoned that niclosamide could synergize with  
294 activators of the Nrf2 pathway and thus increase the levels of protection against cisplatin  
295 ototoxicity. For this purpose we used the zebrafish model for cisplatin ototoxicity to test  
296 niclosamide's protective effect in the presence of ezetimibe, a potent Nrf2 activator and

297 FDA-approved cholesterol-lowering medication (32, **Figure 6A**). The synergistic effect of  
298 the combination of niclosamide and ezetimibe at different concentrations was determined  
299 using classical synergy models (Bliss and Loewe) implemented in the program  
300 Combenefit (33, 34). Both the Bliss and Loewe models suggested highest synergistic  
301 effect between niclosamide and ezetimibe in the prevention of cisplatin damage to  
302 zebrafish HCs when used at 1.48  $\mu$ M ezetimibe and 0.66 nM niclosamide (**Figure 6B**).  
303 Other dose combinations showing synergy are shown in dark blue boxes in the synergy  
304 matrix plot (**Figure 6C**). These results demonstrate that niclosamide and the Nrf2  
305 activator, ezetimibe, act in synergy against cisplatin ototoxicity through activation of the  
306 Nrf2 pathway, while niclosamide could act through multiple Nrf2-independent pathways  
307 such as those identified in our pathway analysis of cisplatin-resistant cancer cell lines  
308 (**Figure 2, Figure 2-figure supplement 2 and Figure 2-table supplement 2**).

### 309 **HPLC analysis demonstrates no interaction between niclosamide and cisplatin**

310 Drug-drug interactions (DDI) through chemical binding could have a negative impact on  
311 cisplatin's antineoplastic effects. A simple explanation of niclosamide's protection against  
312 CIHL is that it can directly inactivate cisplatin, similar to several otoprotectants (e.g.  
313 sodium thiosulfate) that are currently in clinical trials (7, 8). Although our results on NIHIL  
314 and additional xenograft mouse cancer model studies strongly suggest otherwise, we  
315 further investigated any possible DDI between niclosamide and cisplatin. First, by  
316 developing an HPLC method, we showed no chemical interaction between niclosamide  
317 and cisplatin (absence of third peak) at several dose ratios of niclosamide and cisplatin  
318 (**Figure 7A**). Second, by employing the seminoma cancer-derived cell line, NCCIT, in *in*  
319 *vitro* experiments, we demonstrated that niclosamide does not interfere with cisplatin

320 tumor killing activity (**Figure 7B**). Overall, our *in vitro* results demonstrated there is no  
321 chemical or biological interaction between niclosamide and cisplatin, and that niclosamide  
322 is acting as a therapeutic compound to prevent not only CIHL but also NIHL. Moreover,  
323 these last results are consistent with the previously described synergistic cancer killing  
324 activity between niclosamide and cisplatin in renal cell carcinoma (RCC) xenograft  
325 models (18).

## 326 **DISCUSSION**

327 Hearing loss caused by cisplatin, noise, antibiotics, and aging affects 5-10% of the world's  
328 population (35, 36). To date, no drugs have been approved by the FDA for clinical use to  
329 prevent such types of ototoxicity. In this study, we applied widely used bioinformatics tools  
330 (CMap) to cisplatin-resistant and -sensitive cancer cell lines and performed transcriptomic  
331 *in silico* screens of over 54,000 compounds in the CMap. We identified 44 pathways and  
332 more than 30 drug candidates, most of which have never been previously associated with  
333 otoprotection. By employing the inner ear HEI-OC1 cell line and zebrafish neuromasts,  
334 we validated the top 30 compound hits, 26 of which exhibited protection in either assay,  
335 confirming our *in silico* screens. We then zeroed in on niclosamide, a previously FDA-  
336 approved drug that has been widely used in humans for tapeworm treatment for decades.  
337 In addition to its excellent pharmacokinetic/dynamic (PK/PD) properties and safety profile  
338 (27, 37-39), niclosamide exhibits outstanding protective effects against cisplatin- and  
339 noise-induced hearing loss in both zebrafish and mice when administered systemically.  
340 In summary, our work highlights that 1) by using the CMap it is possible to identify  
341 compounds that can regulate biological pathways associated with various pathogenic  
342 conditions including acquired hearing loss; 2) FDA-approved drugs can be repurposed to

343 prevent cisplatin- and noise-induced hearing loss in clinics; and 3) by targeting multiple  
344 biological pathways (37-39) rather than individual pathways, niclosamide can exert better  
345 protection than targeting individual pathways against acquired hearing loss.

346 **Transcriptomic *in silico* screens for therapeutic drugs and biological pathways for**  
347 **hearing loss**

348 The concept of the CMap is to connect molecular pathway genes and pharmaceutical  
349 drugs through transcriptomic profiles. A large collection of transcriptomic profiles has  
350 been obtained and categorized from a variety of cell lines and tissues that have also been  
351 genetically manipulated or treated with each of the approximately 54,000 compounds  
352 included within these databases. Such databases can be unbiasedly screened for both  
353 molecular pathway genes and drugs that exhibit similar or opposing transcriptomic  
354 profiles. The CMap has been used for transcriptomic *in silico* screens for other  
355 physiological phenotypes (9, 11, 12, 15, 16).

356 Clearly, transcriptomic *in silico* screens do not require high-throughput facilities and thus  
357 can be widely used. What are needed for the use of transcriptomic *in silico* screens,  
358 however, are specific transcriptomic profiles of the two conditions in question, either in  
359 cells or in tissues. Our approach here provides a successful example on how to use such  
360 powerful tools (CMap) to identify drug candidates for further validation in subsequent  
361 assays. More importantly, such approaches can be effectively applied to situations where  
362 no cell line assays are appropriate for drug screens. For example, drug screens for NIHL  
363 cannot be performed physically in cell lines; we envision that such *in silico* screens would  
364 be ideal due to the availability of several cochlear transcriptomic profiles for NIHL in  
365 animal models (40, 41). There are no immediate prospects of drug candidates to be



366 approved by the FDA for protection against NIHL, antibiotic-induced or age-related  
367 hearing loss, which affect much larger populations than CIHL, the CMap can therefore be  
368 fruitful in these important unmet health arenas.

369 Although CMap has been a popular resource for data-driven drug repositioning using a  
370 large transcriptomic compendium (42), the genes-pathways-drugs identified using CMap  
371 demand further validation in relevant experimental assays. The extensive overlap  
372 between the molecular signatures associated with cisplatin resistance in cancer cells and  
373 cisplatin ototoxicity in HEI-OC1 cells (**Figure 2-figure supplement 2**) provides validation  
374 for our screening approach. Furthermore, many pathways we identified have been  
375 previously implicated in otoprotection (i.e., B-Raf, CDK2, STAT3 and others) (5, 43).  
376 Iterative ranking of drug candidates based on overlap of target genes in enriched  
377 molecular pathways of cisplatin resistance allowed for unbiased selection of compounds  
378 for further testing. Importantly, in two widely used CIHL assays, 26 of our top 30 drug  
379 candidates tested all exhibited protection in at least one assay. Further *in vivo* testing  
380 showed that a top candidate, niclosamide, protects against CIHL in mice.

### 381 **Repurposing FDA-approved drugs for treatment of hearing loss**

382 Among the 30 drug candidates we identified and validated in our *in silico* screens, 15 are  
383 FDA-approved for indications other than otoprotection. Recently, focused preclinical  
384 studies testing of specific FDA-approved drugs for hearing protection (e.g., statins) have  
385 yielded satisfactory results (5, 43-45), thus making these 15 new FDA-approved drugs  
386 attractive for repurposing as otoprotectants.

387 In general, repurposing FDA-approved drugs offers many advantages over developing  
388 new chemical entities (NCE) (46). The first and most significant is that the safety and

389 PK/PD profiles of FDA-approved drugs are well-defined in their respective dosing and  
390 formulation requirements in both preclinical and clinical studies. With such data available,  
391 even drugs conventionally considered to have undesirable safety profiles may be  
392 repurposed at tolerated dosages for otoprotection (46, 47). This also applies to our top  
393 drug candidate, niclosamide, which originally was approved by the FDA for its toxic effect  
394 against tapeworm infections in humans before later being shown to protect kidneys  
395 against oxaliplatin damage at lower plasma levels compared to the gastrointestinal  
396 system (27, 30). The second significant advantage of repurposing FDA-approved drugs  
397 is the fast and cost-effective path to clinics. Based on FDA data since 2003, the number  
398 of approved repurposed drugs has surpassed that of NCEs (46).

#### 399 **Niclosamide as a candidate drug for clinical trials on hearing loss**

400 With an already established safety profile in humans, niclosamide serves as a promising  
401 therapeutic candidate for expedited FDA approval. Niclosamide has been used safely for  
402 nearly 40 years since 1982 for the treatment of parasitic infections in humans (20, 27,  
403 28). Although it has been discontinued in the US due to commercial reasons, it represents  
404 an excellent opportunity to repurpose this FDA-approved drug for new indications such  
405 as treatment for cancers and hearing loss (37, 48, 49). Niclosamide has many desirable  
406 drug properties: (a) it is effective by itself against colon metastatic tumors such as  
407 HCT116, SW620, LS174T, SW480, and DLD-1 and is synergistic with cisplatin in a  
408 xenograft mouse model of renal cell carcinoma through Wnt/ $\beta$ -catenin signaling (20, 30),  
409 (b) it can be delivered orally, which is a significant advantage over other local delivery  
410 methods. Our results support that niclosamide can cross the BLB in mice. Niclosamide  
411 also has well-defined safety and PK/PD profiles in nonclinical and clinical use. Current

412 ongoing clinical trials for cancer treatment commonly use oral doses up to 2 g/day without  
413 any adverse effects (48, 49). This dose was found to lead to serum  $C_{max}$  ranging from 0.8  
414 to 18  $\mu\text{M}$  (37). In CD1 mice, IP injection of niclosamide at 10 mg/kg single dose (the  
415 otoprotective dose for our NIHL and CIHL) resulted in a  $C_{max}$  of 40  $\mu\text{M}$  (38). In contrast,  
416 120 mg/kg single dose of niclosamide via oral gavage in mice led to a serum  $C_{max}$  at 2  
417  $\mu\text{M}$  at 1 hour, suggesting oral delivery in mice is not optimal (lower bioavailability than in  
418 humans) (39). Despite the low bioavailability of the original drug formulation that has been  
419 used over 40 years, for the purpose of cellular protection, a drug concentration lower than  
420 those approved for cancer treatment might be needed. In support, the  $IC_{50}$  values of  
421 niclosamide in our *in vitro* cell line assay (0.28  $\mu\text{M}$ ) and *in vivo* zebrafish assay (<0.002  
422  $\mu\text{M}$ ) (**Figure 3**) are 100-9,000x fold less than 18  $\mu\text{M}$  (serum  $C_{max}$  corresponding to 2 g/day  
423 human dose), supporting that niclosamide should be sufficiently potent even if it is only  
424 partially absorbed from the intestinal tract. Alternatively, new formulations of niclosamide  
425 can be further tested to increase bioavailability through oral administration or bypassing  
426 gastrointestinal tract through intramuscular or intravenous injections.

### 427 **Niclosamide and the possible mechanisms of action for protection against cisplatin** 428 **ototoxicity**

429 Although a number of pathways have been implicated in other tissues since its original  
430 discovery as an essential world-wide medicine, niclosamide's otoprotective mechanism  
431 was never explored. Here we demonstrated that while several potential downstream  
432 pathways are likely affected in the cochlea upon niclosamide treatment, synergistic  
433 effects are observed when co-incubated with Nrf2 agonists in zebrafish; suggesting that  
434 a combinational treatment at lower doses will be more beneficial to treat hearing loss than

435 individual niclosamide's treatments at higher doses. Thus, targeting multiple pathways is  
436 more effective than targeting a single pathway in battling ototoxicity, and that might be  
437 the key for niclosamide's success. Interestingly, both niclosamide and ezetimibe have  
438 been widely used for different pathological conditions, thus their combination would have  
439 an exciting potential for safe treatment of ototoxicity. Similarly, given that statins are  
440 effective in otoprotection (50) and ezetimibe has a similar indication as statins in lowering  
441 cholesterol, our results suggest that the combination of niclosamide with statins could  
442 have better otoprotection than single-drug treatment.

443 Though niclosamide serves as an ideal potential therapeutic for repurposement for FDA  
444 approval for both cisplatin- and noise-induced hearing loss, future studies should be used  
445 to identify the exact mechanism under which it exerts its otoprotective effects. Given that  
446 our study has elucidated a number of potentially implicated pathways, many of which  
447 have already been identified in previous studies into hearing loss, we posit that the  
448 therapeutic benefits of niclosamide may arise from a large number of mechanisms that  
449 are all converging on cell survival pathways that are typically downregulated in HCs by  
450 cisplatin treatment and noise injury. While numerous converging pathways will likely make  
451 the process of identifying an exact mechanism complicated, such a mechanism may  
452 explain niclosamide's robust protection against two distinct insults with divergent  
453 mechanisms. While *in silico* gene set enrichment analysis served to reveal a number of  
454 these potential otoprotective pathways, each of these pathways must be validated *in vitro*  
455 and *in vivo* to determine exactly what role they may have in granting niclosamide's  
456 otoprotection. Though the exact molecular mechanism remains unknown, the  
457 identification of niclosamide as a novel otoprotective agent nevertheless demonstrates

458 the advantages of using the connectivity map to conduct large-scale drug screens, the  
459 results of which can be further reinforced by both *in vitro* and *in vivo* studies to identify  
460 and characterize novel drug candidates.

## 461 **MATERIALS AND METHODS**

### 462 **Materials**

463 All drugs tested were purchased from Cayman Chemical (USA). Cisplatin vials (aqueous  
464 solution of 1 mg/mL, Accord Healthcare, Durham, NC) were obtained from Creighton  
465 University Pharmacy.

466 Antibodies used included: C-terminal binding protein-2 (mouse anti-Ctbp2; BD  
467 Transduction Labs, used at 1:200), myosin-VI (rabbit anti-myosin-VI; Proteus  
468 Biosciences, used at 1:200), anti-otoferlin (HCS-1, DSHB 1:500) and anti-GFP (NB100-  
469 1614, Novus Biologicals 1:500).

### 470 **Drug identification using LINCS and GDA**

471 RNA-seq studies of cisplatin-resistant and -sensitive parental lines available in the public  
472 Gene Expression Omnibus (GEO) database were analyzed using the National Center for  
473 Biotechnology Information (NCBI)'s GEO2R tool  
474 (<https://www.ncbi.nlm.nih.gov/geo/geo2r/>) to identify differentially expressed genes  
475 between the two groups. Genes with an absolute log-fold change greater than 1 were  
476 downloaded from each study and analyzed with the GDA (<http://gda.unimore.it/index.php>)  
477 and LINCS (<https://maayanlab.cloud/L1000CDS2/#/index>) databases to identify  
478 compounds inducing similar gene expression profiles in various cell lines.

479 The LINCS analysis relies on a subset of the 1,319,138 genetic profiles originally

480 compiled in the L1000 compendium (13). For each profile, an overlap score between 0-1  
481 was given, indicating the fraction of genes overlapping from the gene set input. With over  
482 500 identified compounds of interest, we further narrowed down the results of our screen  
483 by selecting those compounds with an overlap score  $>0.1$ , indicating at least a 10%  
484 overlap between the small molecule perturbation from the databases and our gene  
485 expression profile.

486 The GDA tool was also used to search the gene expression values of cells treated with  
487 50,816 different compounds originally derived from the NCI-60 GI<sub>50</sub> file (14). A P-value is  
488 generated for each identified drug based on the responsiveness of both parental and  
489 mutant cancer cell lines treated with each compound. The benefit of GDA lies in its  
490 comprehensive list of compounds in combination with over 73 cell lines. However, GDA  
491 requires separate inputs for up- and down-regulated genes, meaning that it does not  
492 provide profiles which comprehensively match differential gene expression. Compounds  
493 with a P-value  $<0.05$  from GDA were selected from each database for further  
494 characterization.

### 495 **Signaling pathway analysis of cancer cell lines**

496 The up and downregulated genes across all nine studies obtained by using the GEO2R  
497 tool were compiled, and duplicates were removed to exclude genes that had contradicting  
498 expression across the GEO studies. The resulting list of genes for all cancer lines was  
499 loaded into ShinyGO v0.66 (<http://bioinformatics.sdstate.edu/go/>) for pathway enrichment  
500 analyses. The ShinyGO analysis tool contains a total of 4,559 upregulated and 5,141  
501 downregulated genes that can be used for gene set enrichment analysis (GSEA) to  
502 identify significantly enriched up and downregulated pathways. The gene expression data

503 sets identified in our study were annotated using the KEGG database, and those with  
504 false detection rate (FDR) P-value <0.05 were reported.

### 505 **RNA-seq analysis of HEI-OC1 cells treated with cisplatin**

506 HEI-OC1 cells (a generous gift from Dr. Kalinec, House Ear Institute) (18) were exposed  
507 to 70  $\mu$ M cisplatin for 15 hours and total RNA was extracted with TRIzol (Thermo Fisher  
508 Scientific, USA). Samples (1  $\mu$ g total RNA per sample, n=2 per treatment) were shipped  
509 to Novogene (California, USA) for RNA sequencing and bioinformatic analysis. The  
510 metadata file, raw sequencing fastq files and normalized expression values (in Excel  
511 format) are available from the NCBI GEO submission number: GSE180141.

### 512 **Cell culture and apoptosis assay**

513 The apoptosis assay was performed as previously described (43). Briefly, HEI-OC1 cells  
514 were pretreated with each of the 30 drug candidates at concentrations ranging from 2 nM  
515 to 40  $\mu$ M one hour before co-incubation with cisplatin, 50 $\mu$ M for an additional 19 hours.  
516 Caspase-Glo 3/7 assay (Promega, Madison, WI) (5) was run in triplicate and results  
517 normalized to cisplatin-only and medium-only controls. The percent of caspase activity  
518 was used to determine the relative protective effect of each compound, calculated using  
519 the following formula:

520 Caspase activity % = [(Drug/cisplatin incubation – Control)/(Cisplatin incubation –  
521 Control)] x 100

### 522 **Animals and drug administration**

523 Animal procedures (fish and mice) were approved by the Institutional Animals Care and  
524 Use Committee at Creighton University.

525 For fish studies, 5 dpf larvae were maintained at 28.5°C in E3 water (5 mM NaCl, 0.17  
526 mM KCl, 0.33 mM CaCl<sub>2</sub>, and 0.33 mM MgSO<sub>4</sub>, pH 7.2) and treated as previously  
527 described (54). HCs were counted from SO3 and O1-2 neuromasts.

528 For mouse studies, 5 to 7-weeks old FVB/NJ mice were obtained from The Jackson  
529 Laboratory (Bar Harbor, ME, USA), with a mix of males and females across experiments.  
530 FVB/NJ mice were treated with 10 mg/kg niclosamide via IP. Niclosamide was dissolved  
531 in 1% DMSO in normal saline (0.9% NaCl solution) and vortexed multiple times before  
532 injections. Niclosamide treatment started 24 hours before cisplatin (30 mg/kg divided into  
533 2 doses, IP) or noise exposure (8-16 kHz octave band noise 100 dB SPL for 2 hours) and  
534 continued once daily for 3 more days. In the case of cisplatin, the administration protocol  
535 was designed based on a 5-days post-cisplatin treatment. Our previous publication  
536 showed that this *in vivo* cisplatin model produces similar results to the cisplatin models in  
537 which cisplatin was given in three cycles to CBA/CaJ mice (51).

### 538 **Zebrafish drug studies**

539 For the screenings, 5-day post-fertilization (dpf) *Tg(brn3c:mGFP)* larvae were pre-  
540 incubated with each of the 30 drug candidates at 0.002, 0.0183, 0.165, 1.48, and 13.3  
541 µM for as previously described (25, 54).

### 542 **Niclosamide/ezetimibe experiments in zebrafish**

543 Synergistic interaction between niclosamide and the Nrf2 agonist ezetimibe was tested  
544 in 5-dpf zebrafish. Ezetimibe was used at 0.002 µM to 13.3 µM concentrations while  
545 niclosamide was used at 0.02 nM to 18.3 nM concentrations. Synergy analysis was  
546 conducted using Combenefit software that enables the analysis, advanced visualization



547 and quantification of drug and other agent combinations. Combenefit performs  
548 combination analyses using the standard Loewe, Bliss, HSA and a newly developed  
549 SANE model (33, 34).

550 **Auditory brainstem response (ABR), distortion product otoacoustic emissions**  
551 **(DPOAEs) and noise exposure**

552 FVB/NJ mice (6 to 7-weeks old) were used for the cisplatin and noise experiments and  
553 hearing function (ABRs and DPOAEs) tested as described before (5, 43). Briefly, ABR  
554 tests were performed 2-3 days before cisplatin exposure, and 5 days post-cisplatin  
555 exposure. For the noise experiments, auditory tests were performed 2-3 days prior to  
556 noise exposure, and 14 days post noise. Following the final auditory function  
557 measurements, mice were euthanized, and cochleae were collected for morphological  
558 assessment.

559 **Image analysis**

560 After the different treatments the inner ear was microdissected and stained for CtBP2  
561 (ribbon synapses marker) or myosin-VI (HC marker) as previously described (5, 43, 51).  
562 The organ of Corti was imaged using a confocal microscope (Zeiss LSM 700) with an oil  
563 immersion objective (40x, numerical aperture 1.3) and a digital zoom of 1X. The total  
564 number of OHCs was calculated by counting the number of cells in the three rows of  
565 OHCs within a 100- $\mu$ m length of the cochlea. For IHC ribbon synapse quantification, 3D  
566 (x-y-z-axis) images were scanned with the 2X digital zoom. Each immunostained  
567 presynaptic CtBP2 puncta was counted as a ribbon synapse (26, 56). Synaptic ribbons  
568 of ten consecutive IHCs distributed within the mid-basal frequency region were counted.

569 For neuromast imaging, samples were analyzed under a Zeiss LSM 710 confocal  
570 microscope with an oil immersion objective of 63X (numerical aperture 1.4) and 2x digital  
571 zoom.

## 572 **High-performance liquid chromatography (HPLC)**

573 To assess whether niclosamide chemically interacts with cisplatin, we performed HPLC  
574 analysis. Stock solutions of cisplatin and niclosamide 1 mg/mL were prepared and mixed  
575 at a ratio of cisplatin:niclosamide 1:1 and 1:10 in the final injecting solution. Niclosamide-  
576 and cisplatin-only were also run.

## 577 **Experimental design and statistical analysis**

578 Cell studies: For sample-size estimation we based on previous published data from our  
579 laboratory (5). All cell culture experiments were run in triplicate, and each considered a  
580 biological replicate for the statistical analysis. Outliers were considered to be those  
581 samples with percent caspase activity <-50%, which indicates total cell die-off likely due  
582 to a technical error. One-way ANOVA of drug-treated cells versus cisplatin-treated cells  
583 was used to calculate significance, followed by Dunnett's multiple comparison test. Exact  
584 p values and 95% confident intervals (CIs) are included in the source data for **Figure 3A**.  
585 Results are presented as mean +/- SD.

586 Data from the bulk RNA-seq of cisplatin treated cells is available under GEO accession  
587 GSE180141.

588 Zebrafish studies: Five fish were employed per treatment and 2-3 neuromasts (SO3, O1  
589 and O2) were inspected per fish. Each neuromast was considered a biological replicate.  
590 No explicit power analysis was performed to compute the sample size for the zebrafish

591 experiments, sample size was based on previous studies from our laboratory (54). Only  
592 one experiment was performed for the initial screening of all the compounds and results  
593 were expressed as percentage of protection respect to controls. To further assess  
594 niclosamide's effect, two independent biological experiments, were performed and results  
595 were expressed as number of HCs per neuromast. Statistical analysis: One-sample t-test  
596 run by the Combenefit software (33,34) was used for the synergy studies. One-way  
597 ANOVA followed by Dunnett's multiple comparison test was performed employing  
598 GraphPad for the rest of the studies. Exact p values and 95% CIs are included in the  
599 source data for Figure 3B. Fish samples were coded and HCs counts were assessed by  
600 an operator that was blinded to the group treatment. Results were presented as mean +/-  
601 SD.

602 Mice studies: Each animal was considered a biological replicate. For audiometric  
603 measurements, eight animals were used per treatment. For HC counting 4 organs of Corti  
604 from 4 different animals were inspected. For CtBP2 counting, 5 organs of Corti from 5  
605 different animals were assessed. In both cases, each tissue sample was considered an  
606 independent biological replicate. The group size was calculated based on an effect size  
607 of 0.5 at alpha = 0.05 with an effective power of 0.868 (G\*Power) (5, 43). Comparisons  
608 between the treatments for ABR (cisplatin exposure) were performed using two-way  
609 ANOVA followed by Tukey's multiple comparison test and the Sidak's multiple  
610 comparison test for ABRs and DPOAEs for the noise studies. One-way ANOVA followed  
611 by Dunnett's multiple comparison test was used for CtBP2 puncta and OHCs analysis.  
612 ABR/DPOAE thresholds, HC count, and CtBP2 puncta counts were determined by an  
613 independent observer who was blinded to the group of mice.

614 *For all the experimental data:* GraphPad Prism v8/9 was used for statistical analysis.

615 Unless specified, no outliers were identified employing the GraphPad tool function. When

616 possible, equal number of males and females were employed for the experiments.

617 Randomization was used for the zebrafish and mouse experiments. Statistical

618 significance was set at p-value  $\leq 0.05$ .

619

620 **REFERENCES**

- 621 1. X. Chen, Y. Wu, H. Dong, C. Y. Zhang, Y. Zhang. Platinum-based agents for  
622 individualized cancer treatment. *Mol. Med.* **13**, 1603-1612 (2013).
- 623 2. T. Magnes, A. Egle, R. Greil, T. Melchardt. Update on squamous cell carcinoma  
624 of the head and neck: *ASCO annual meeting.* **10**, 220-223 (2017).
- 625 3. D. T. Dickey, Y. J. Wu, L. L. Muldoon, E. A. Neuwelt. Protection against cisplatin-  
626 induced toxicities by N-acetylcysteine and sodium thiosulfate as assessed at the  
627 molecular, cellular, and in vivo levels. *J. Pharmacol. Exp. Ther.* **314**, 1052-1058  
628 (2005).
- 629 4. H. S. So, C. Park, K. J. Kim, J. H. Lee, S. Y. Park, J. H. Lee, Z. W. Lee, H. M. Kim,  
630 F. Kalinec, D. J. Lim, R. Park. Protective effect of T-type calcium channel blocker  
631 flunarizine on cisplatin-induced death of auditory cells. *Hear. Res.* **204**, 127-139  
632 (2005).
- 633 5. T. Teitz, J. Fang, A. N. Goktug, J. D. Bonga, S. Diao, R. A. Hazlitt, L. Iconaru, M.  
634 Morfouace, D. Currier, Y. Zhou, R. A. Umans, M. R. Taylor, C. Cheng, J. Min, B.  
635 Freeman, J. Peng, M. R. Roussel, R. Kriwacki, R. K. Guy, T. Chen, J. Zuo. CDK2  
636 inhibitors as candidate therapeutics for cisplatin- and noise-induced hearing loss.  
637 *J. Exp. Med.* **215**, 1187-1203 (2018).
- 638 6. T. G. Baker, S. Roy, C. S. Brandon, I. K. Kramarenko, S. P. Francis, M. Taleb, K.  
639 M. Marshall, R. Schwendener, F. S. Lee, L. L. Cunningham. Heat shock protein-  
640 mediated protection against Cisplatin-induced hair cell death. *J. Assoc. Res.*  
641 *Otolaryngol.* **16**, 67-80 (2015).
- 642 7. S. J. Kim, C. Park, A. L. Han, M. J. Youn, J. H. Lee, Y. Kim, E. S., Kim, H. J. Kim,

- 643 J. K. Kim, H. K. Lee, S. Y. Chung, H. So, R. Park. Ebselen attenuates cisplatin-  
644 induced ROS generation through Nrf2 activation in auditory cells. *Hear. Res.* **251**,  
645 70-82 (2009).
- 646 8. Brock PR, Maibach R, Childs M, K. Rajput, D. Roebuck, M. J. Sullivan, V. Laithier,  
647 M. Ronghe, P. Dall'igna, E. Hiyama, B. Brichard, J. Skeen, M. E. Mateos, M.  
648 Capra, A. A. Rangaswami, M. Ansari, C. Rechnitzer, G. J. Veal, A. Covezzoli, L.  
649 Brugieres, G. Perilongo, P. Czauderna, B. Morland, E. A. Neuwelt. Sodium  
650 Thiosulfate for Protection from Cisplatin-Induced Hearing Loss. *N. Engl. J. Med.*  
651 **378**, 2376-2385 (2018).
- 652 9. M. Ryals, R. J. Morell, D. Martin, E. T. Boger, P. Wu, D. W. Raible, L. L.  
653 Cunningham. The Inner Ear Heat Shock Transcriptional Signature Identifies  
654 Compounds That Protect Against Aminoglycoside Ototoxicity. *Front. Cell.*  
655 *Neurosci.* **12**, 445 (2018).
- 656 10. Kitcher SR, Kirkwood NK, Camci ED, et al. ORC-13661 protects sensory hair cells  
657 from aminoglycoside and cisplatin ototoxicity. *JCI Insight* 2019;4. PMID:  
658 31391343.
- 659 11. Lamb J, Crawford ED, Peck D, et al. The Connectivity Map: using gene-expression  
660 signatures to connect small molecules, genes, and disease. *Science*  
661 2006;313:1929-35. PMID: 17008526.
- 662 12. Musa A, Ghorraie LS, Zhang SD, et al. A review of connectivity map and  
663 computational approaches in pharmacogenomics. *Brief Bioinform* 2018;19:506-  
664 23. PMID: 28069634.
- 665 13. Duan Q, Reid SP, Clark NR, et al. L1000CDS(2): LINCS L1000 characteristic

- 666 direction signatures search engine. NPJ Syst Biol Appl 2016;2. PMID: 28413689.
- 667 14. Caroli J, Sorrentino G, Forcato M, Del Sal G, Bicciato S. GDA, a web-based tool  
668 for Genomics and Drugs integrated analysis. Nucleic Acids Res 2018;46:W148-  
669 W56. PMID: 29800349.
- 670 15. Le BL, Andreoletti G, Oskotsky T, et al. Transcriptomics-based drug repositioning  
671 pipeline identifies therapeutic candidates for COVID-19. Res Sq 2021. PMID:  
672 33821262.
- 673 16. Krishnamoorthy P, Raj AS, Roy S, Kumar NS, Kumar H. Comparative  
674 transcriptome analysis of SARS-CoV, MERS-CoV, and SARS-CoV-2 to identify  
675 potential pathways for drug repurposing. Comput Biol Med 2021;128:104123.  
676 PMID: 33260034.
- 677 17. Ge SX, Jung D, Yao R. ShinyGO: a graphical gene-set enrichment tool for animals  
678 and plants. Bioinformatics 2020;36:2628-9. PMID: 31882993.
- 679 18. Kalinec GM, Webster P, Lim DJ, Kalinec F. A cochlear cell line as an in vitro system  
680 for drug ototoxicity screening. Audiol Neurootol 2003;8:177-89. PMID: 12811000.
- 681 19. Ou HC, Santos F, Raible DW, Simon JA, Rubel EW. Drug screening for hearing  
682 loss: using the zebrafish lateral line to screen for drugs that prevent and cause  
683 hearing loss. Drug Discov Today 2010;15:265-71. PMID: 20096805.
- 684 20. Zhao J, He Q, Gong Z, Chen S, Cui L. Niclosamide suppresses renal cell  
685 carcinoma by inhibiting Wnt/beta-catenin and inducing mitochondrial dysfunctions.  
686 Springerplus 2016;5:1436. PMID: 27652012.
- 687 21. Tilabi J, Upadhyay RR. Adenoma formation by ingenol 3,5,20-triacetate. Cancer  
688 Lett 1983;18:317-20. PMID: 6406043.

- 689 22. Gregory MA, D'Alessandro A, Alvarez-Calderon F, et al. ATM/G6PD-driven redox  
690 metabolism promotes FLT3 inhibitor resistance in acute myeloid leukemia. Proc  
691 Natl Acad Sci U S A 2016;113:E6669-E78. PMID: 27791036
- 692 23. Le Prell CG, Yamashita D, Minami SB, Yamasoba T, Miller JM. Mechanisms of  
693 noise-induced hearing loss indicate multiple methods of prevention. Hear Res  
694 2007;226:22-43. PMID: 17141991.
- 695 24. Sheth S, Mukherjea D, Rybak LP, Ramkumar V. Mechanisms of Cisplatin-Induced  
696 Ototoxicity and Otoprotection. Front Cell Neurosci 2017;11:338. PMID: 29163050.
- 697 25. Sheets L. Excessive activation of ionotropic glutamate receptors induces apoptotic  
698 hair cell death independent of afferent and efferent innervation. Sci Rep  
699 2017;7:41102. PMID: 28112265.
- 700 26. Kujawa SG, Liberman MC. Acceleration of age-related hearing loss by early noise  
701 exposure: evidence of a misspent youth. J Neurosci 2006;26:2115-23. PMID:  
702 16481444.
- 703 27. Chen W, Mook RA, Jr., Premont RT, Wang J. Niclosamide: Beyond an  
704 antihelminthic drug. Cell Signal 2018;41:89-96. PMID: 28389414.
- 705 28. Park JS, Lee YS, Lee DH, Bae SH. Repositioning of niclosamide ethanolamine  
706 (NEN), an anthelmintic drug, for the treatment of lipotoxicity. Free Radic Biol Med  
707 2019;137:143-57. PMID: 31035006.
- 708 29. Sack U, Walther W, Scudiero D, et al. Novel effect of antihelminthic Niclosamide  
709 on S100A4-mediated metastatic progression in colon cancer. J Natl Cancer Inst  
710 2011;103:101836. PMID: 21685359.
- 711 30. Ge SX, Jung D, Yao R. ShinyGO: a graphical gene-set enrichment tool for animals



- 712 and plants. *Bioinformatics* 2020;36:2628-9. PMID: 31882993.
- 713 31. Zhang W, Xiong H, Pang J, et al. Nrf2 activation protects auditory hair cells from  
714 cisplatin induced ototoxicity independent on mitochondrial ROS production.  
715 *Toxicol Lett* 2020;331:1-10. PMID: 32428544.
- 716 32. Lee D, Hoon Han D, Nam K, Park J, Kim S, Lee M, Kim G, Min B, Cha B, Lee Y,  
717 Sung S, Jeong H, Ji H, Lee M, Lee J, Lee H, Chun Y, Kim J, Komatsu M, Lee Y,  
718 Bae S. Ezetimibe, an NPC1L1 inhibitor, is a potent Nrf2 activator that protects mice  
719 from diet-induced nonalcoholic steatohepatitis. *Free Radic Biol Med* 2016;99:520-  
720 32. PMID: 27634173
- 721 33. Loewe S. The problem of synergism and antagonism of combined drugs.  
722 *Arzneimittelforschung* 1953;3:285-90. PMID: 13081480.
- 723 34. Di Veroli GY, Fornari C, Wang D, et al. Combenefit: an interactive platform for the  
724 analysis and visualization of drug combinations. *Bioinformatics* 2016;32:2866-8.  
725 PMID: 27153664.
- 726 35. Organization DahlWH. [https://www.who.int/news-room/fact-](https://www.who.int/news-room/fact-sheets/detail/deafness-andhearing-loss)  
727 [sheets/detail/deafness-andhearing-loss](https://www.who.int/news-room/fact-sheets/detail/deafness-andhearing-loss). 2020.
- 728 36. Le Prell CG. Otoprotectants: From Research to Clinical Application. *Semin Hear*  
729 2019;40:162-76. PMID: 31036993.
- 730 37. Oh HC, Shim JK, Park J, et al. Combined effects of niclosamide and temozolomide  
731 against human glioblastoma tumorspheres. *J Cancer Res Clin Oncol*  
732 2020;146:2817-28. PMID: 32712753.
- 733 38. Bhagat HA, Compton SA, Musso DL, et al. N-substituted phenylbenzamides of the  
734 niclosamide chemotype attenuate obesity related changes in high fat diet fed mice.

- 735 PLoS One 2018;13:e0204605. PMID: 30359371.
- 736 39. Cerles O, Benoit E, Chereau C, et al. Niclosamide Inhibits Oxaliplatin Neurotoxicity  
737 while Improving Colorectal Cancer Therapeutic Response. Mol Cancer Ther  
738 2017;16:300-11. PMID: 27980107.
- 739 40. Gratton MA, Eleftheriadou A, Garcia J, et al. Noise-induced changes in gene  
740 expression in the cochleae of mice differing in their susceptibility to noise damage.  
741 Hear Res. 2011; (1-2):211-26. PMID: 21187137
- 742 41. Jongkamonwiwat N, Ramirez MA, Edassery S, et al. Noise Exposures Causing  
743 Hearing Loss Generate Proteotoxic Stress and Activate the Proteostasis Network.  
744 Cell Rep. 2020; 24;33(8):108431. PMID: 33238128.
- 745 42. Lim N, Pavlidis P. Evaluation of connectivity map shows limited reproducibility in  
746 drug repositioning Sci Rep. 2021; 11(1):17624. PMID: 34475469
- 747 43. Ingersoll MA, Malloy EA, Caster LE, et al. BRAF inhibition protects against hearing  
748 loss in mice. Sci Adv 2020;6. PMID: 33268358.
- 749 44. Yu Y, Hu B, Bao J, et al. Otoprotective Effects of *Stephania tetrandra* S. Moore  
750 Herb Isolate against Acoustic Trauma. J Assoc Res Otolaryngol 2018;19:653-68.  
751 PMID: 30187298.
- 752 45. Salehi P, Akinpelu OV, Waissbluth S, et al. Attenuation of cisplatin ototoxicity by  
753 otoprotective effects of nanoencapsulated curcumin and dexamethasone in a  
754 guinea pig model. Otol Neurotol 2014;35:1131-9. PMID: 24841915.
- 755 46. A. A. Repurposing Existing Drugs for New Indications. The-Scientist 2017.
- 756 47. Malaviya AN. Landmark papers on the discovery of methotrexate for the treatment  
757 of rheumatoid arthritis and other systemic inflammatory rheumatic diseases: a

- 758           fascinating story. *Int J Rheum Dis* 2016;19:844-51. PMID: 27293066.
- 759           48. Schweizer MT, Haugk K, McKiernan JS, et al. A phase I study of niclosamide in  
760           combination with enzalutamide in men with castration-resistant prostate cancer.  
761           *PLoS One* 2018;13:e0198389. PMID: 29856824
- 762           49. Burock S, Daum S, Keilholz U, Neumann K, Walther W, Stein U. Phase II trial to  
763           investigate the safety and efficacy of orally applied niclosamide in patients with  
764           metachronous or synchronous metastases of a colorectal cancer progressing after  
765           therapy: the NIKOLO trial. *BMC Cancer* 2018;18:297. PMID: 29544454.
- 766           50. Fernandez K, Spielbauer KK, Rusheen A, Wang L, Baker TG, Eyles S,  
767           Cunningham LL. Lovastatin protects against cisplatin-induced hearing loss in  
768           mice. *Hear Res* 2020;389:107905. PMID: 32062294.
- 769           51. Muniak MA, Rivas A, Montey KL, May BJ, Francis HW, Ryugo DK. 3D model of  
770           frequency representation in the cochlear nucleus of the CBA/J mouse. *J Comp*  
771           *Neurol* 2013;521:1510-32. PMID: 23047723.
- 772           52. Muniak MA, Rivas A, Montey KL, May BJ, Francis HW, Ryugo DK. 3D model of  
773           frequency representation in the cochlear nucleus of the CBA/J mouse. *J Comp*  
774           *Neurol* 2013;521:1510-32. PMID: 23047723.
- 775           53. Sergeyenko Y, Lall K, Liberman MC, Kujawa SG. Age-related cochlear  
776           synaptopathy: an early-onset contributor to auditory functional decline. *J Neurosci*  
777           2013;33:13686-94. PMID: 23966690.
- 778           54. Zallocchi M, Hati S, Xu Z, Hausman W, Liu H, He D Z, Zuo J. Characterization of  
779           quinoxaline derivatives for protection against iatrogenically induced hearing loss.  
780           *JCI Insights*, 2021;6(5):e141561.

781

782 **ACKNOWLEDGEMENTS**

783 We thank Emma Malloy and Tal Teitz for their help on cancer cell lines, Zhuo Li and Kan  
784 Lin for cell culture, Molly Kubesh for pathway analysis, and Mrs. Xianghong Liu for  
785 technical support. We also want to thank members of the Translational Hearing Center at  
786 Creighton University and Drs. Sung-Ho Huh and Wallace Thoreson at the University of  
787 Nebraska Medical Center for their comments. We thank Drs. Silvio Biccato and Jimmy  
788 Caroli at the University of Modena, Italy for their initial assistance in the use of the GDA  
789 database. This work was supported in part by NIH-R01DC015444, NIH-R01DC015010,  
790 USAMRMC-RH170030, ONR-N00014-18-1-2507, and LB692/Creighton to JZ, by DoD-  
791 RH190050 and the Bellucci Foundation Award to MZ, by NIH-R43 DC018762 to PS (and  
792 subcontract to JZ), and by NIH1P20GM139762.

793 **COMPETING INTEREST**

794 JZ, PS, SV, and MZ are inventors on a provisional/PCT patent application filed for the  
795 use of niclosamide in hearing protection. JZ is the co-founder of Ting Therapeutics LLC.  
796 MZ is CSO of Ting Therapeutics LLC, and PS is the PI of NIH-R43 DC018762 to Ting  
797 Therapeutics LLC. The other authors declare no competing interests.

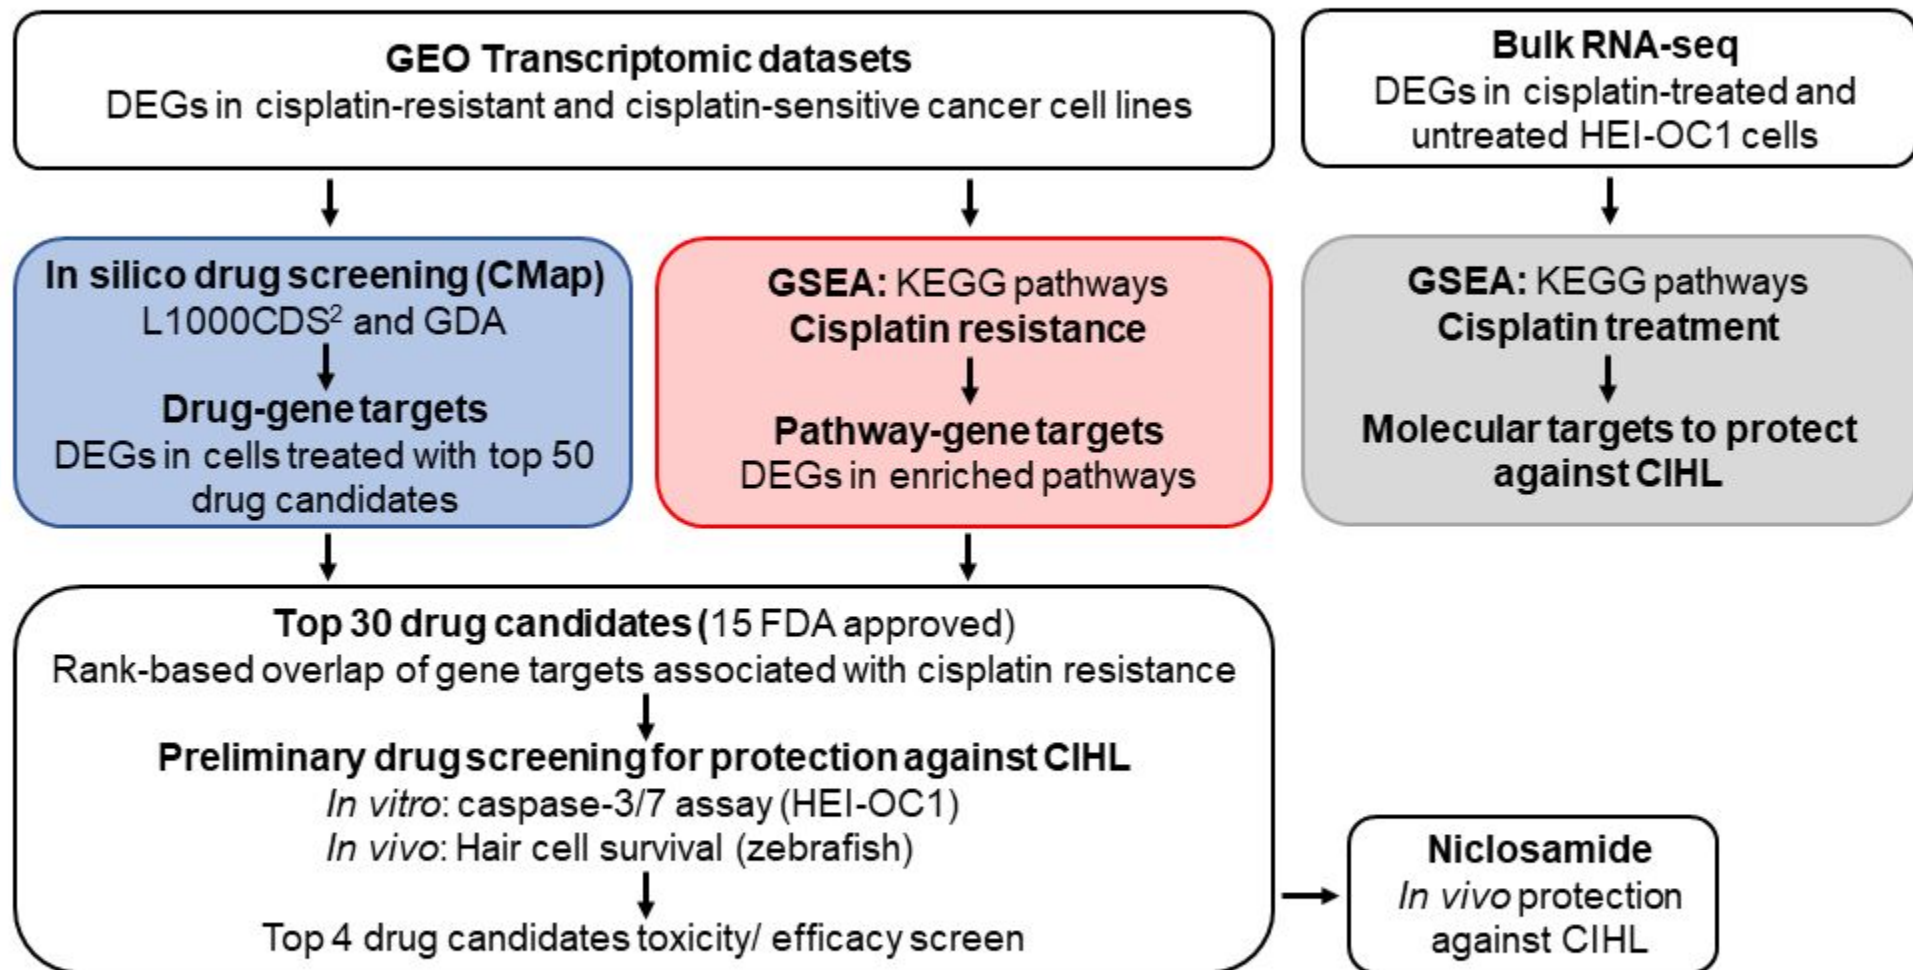

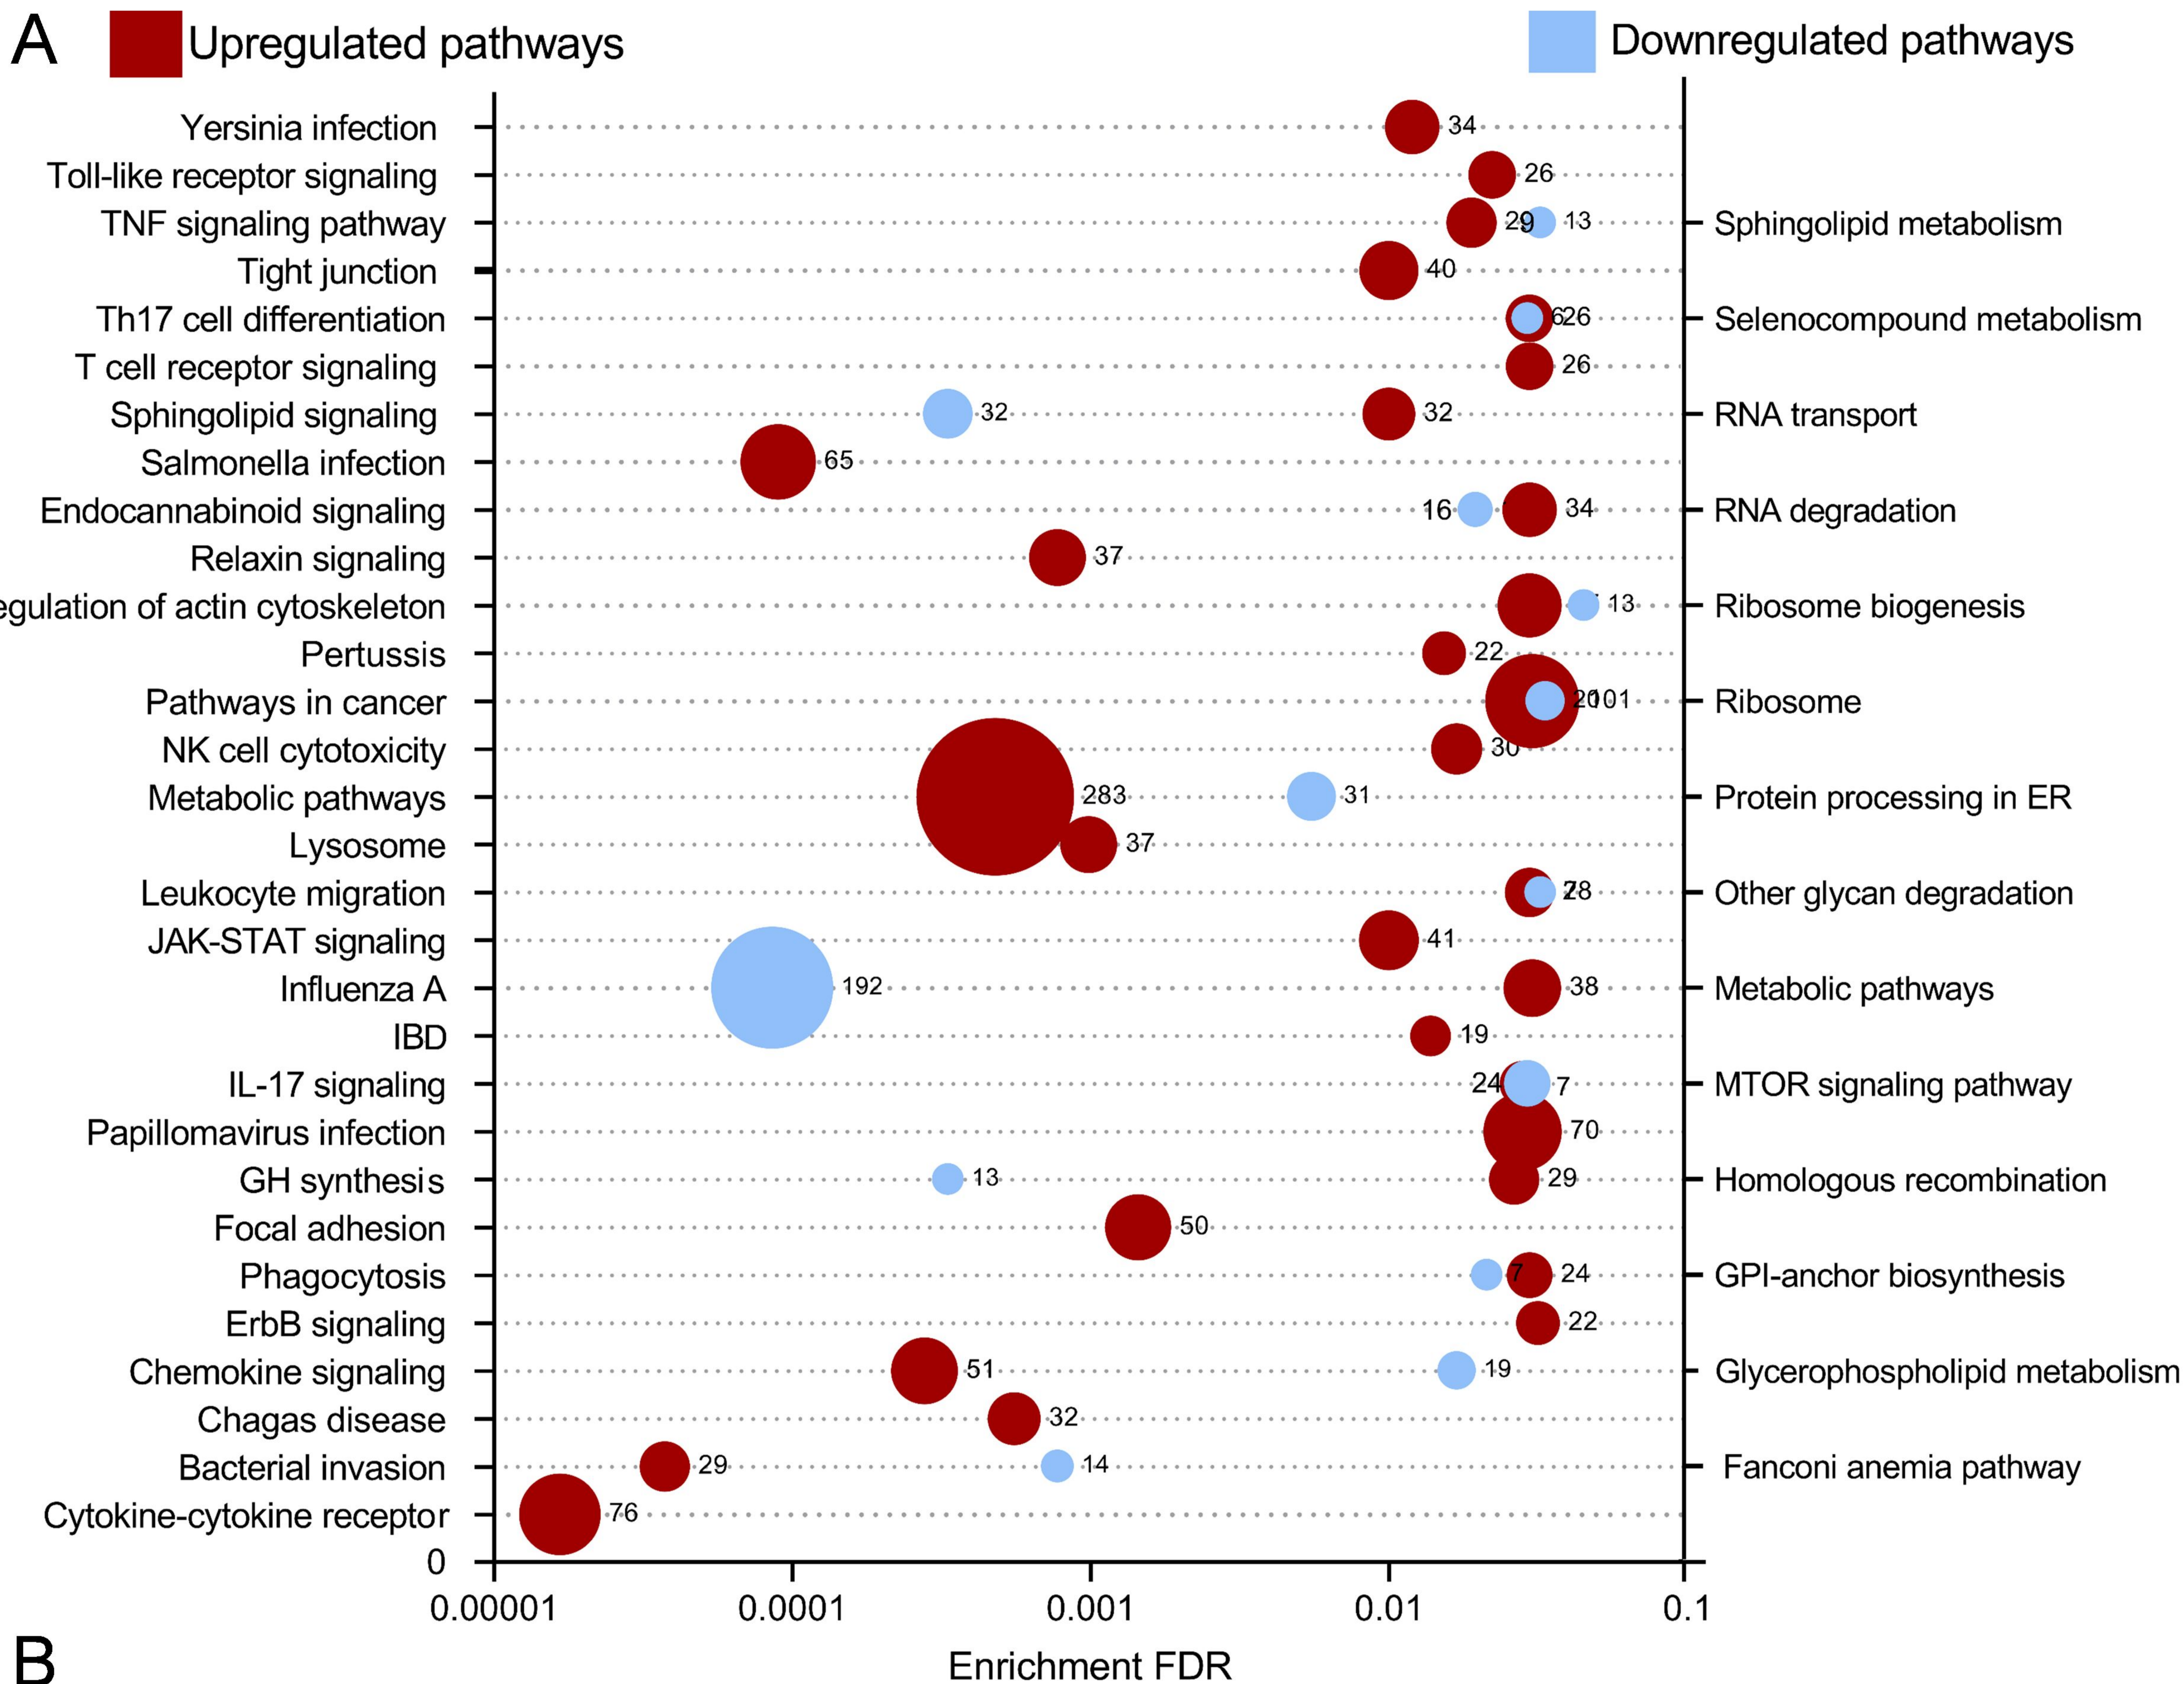

**B**

bioRxiv preprint doi: <https://doi.org/10.1101/2022.01.26.477630>; this version posted January 28, 2022. The copyright holder for this preprint (which was not certified by peer review) is the author/funder, who has granted bioRxiv a license to display the preprint in perpetuity. It is made available under aCC-BY 4.0 International license.

| Rank | Drug                | Up | Down | Rank | Drug         | Up | Down | Rank | Drug         | Up | Down |
|------|---------------------|----|------|------|--------------|----|------|------|--------------|----|------|
| 1    | Perhexiline Maleate | 48 | 24   | 11   | Raltitrexed  | 42 | 9    | 21   | Irinotecan   | 21 | 9    |
| 2    | Salermide           | 47 | 14   | 12   | Captopril    | 40 | 10   | 22   | Dasatinib    | 21 | 5    |
| 3    | Triptolide          | 51 | 9    | 13   | Rottlerin    | 34 | 15   | 23   | Niclosamide  | 20 | 3    |
| 4    | Prothionamide       | 46 | 9    | 14   | Elesclomol   | 37 | 12   | 24   | Radicicol    | 16 | 1    |
| 5    | Succimer            | 46 | 9    | 15   | Importazole  | 38 | 11   | 25   | Everolimus   | 7  | 2    |
| 6    | 6-Mercaptopurine    | 35 | 12   | 16   | DCPIB        | 37 | 11   | 26   | Vorinostat   | 5  | 2    |
| 7    | Chaetocin           | 29 | 15   | 17   | Ixazomib     | 30 | 12   | 27   | Manumycin A  | 3  | 3    |
| 8    | 5-fluorouracil      | 43 | 10   | 18   | Ingenol      | 23 | 14   | 28   | Wortmannin   | 3  | 2    |
| 9    | Palbociclib         | 35 | 17   | 19   | Thioridazine | 19 | 11   | 29   | Parthenolide | 3  | 1    |
| 10   | Emetine             | 29 | 23   | 20   | Camptothecin | 17 | 13   | 30   | Dimercaprol  | 2  | 0    |

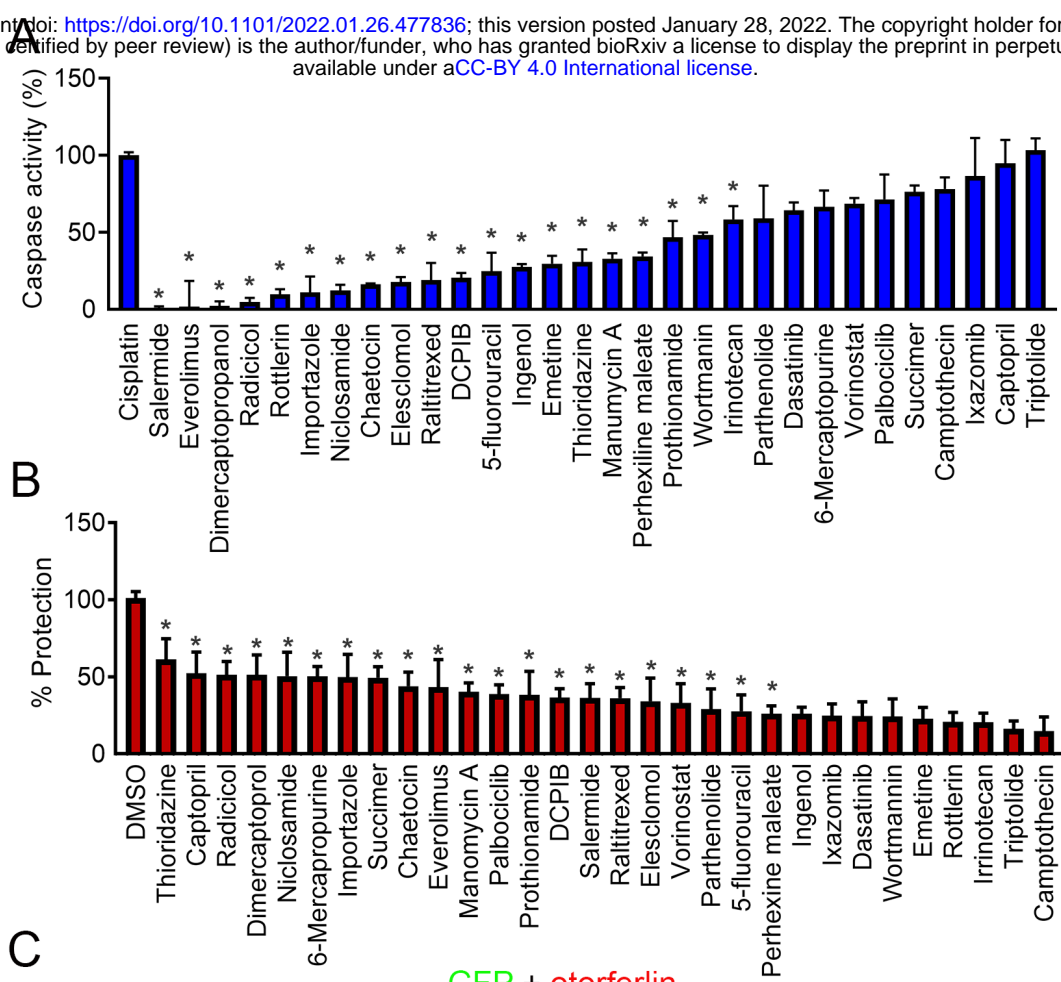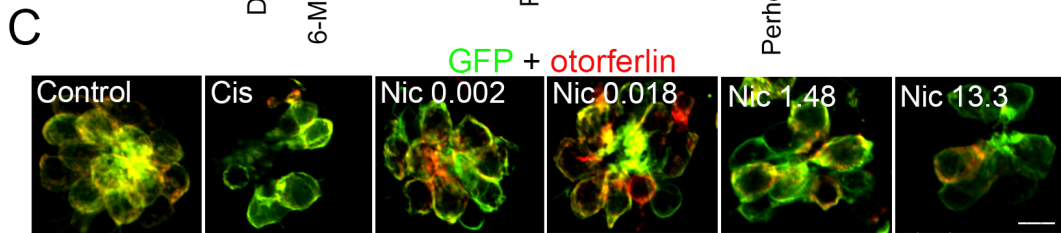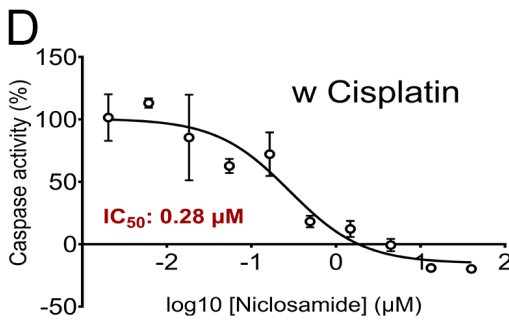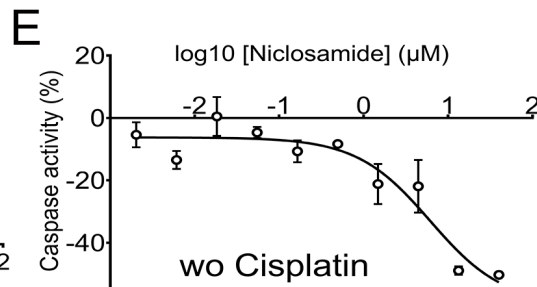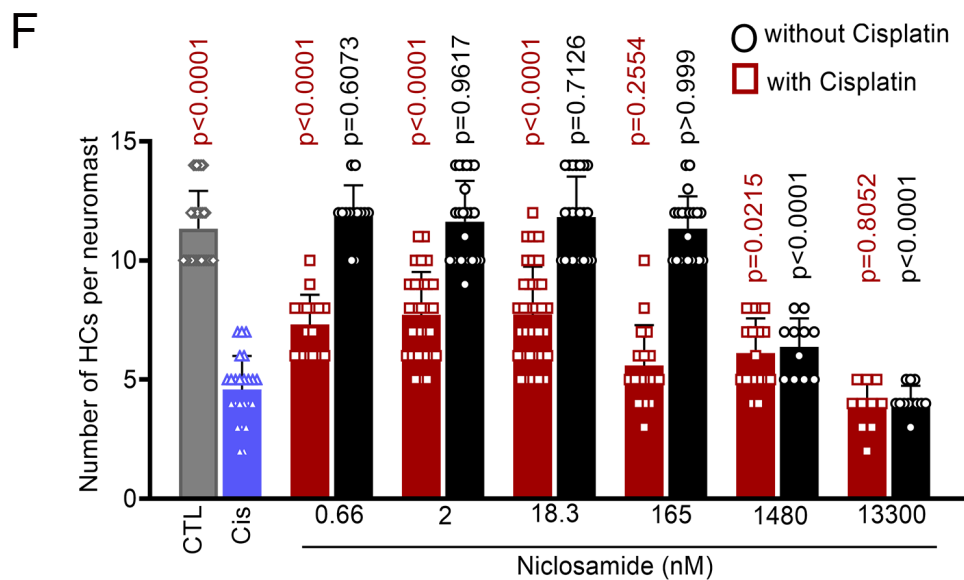



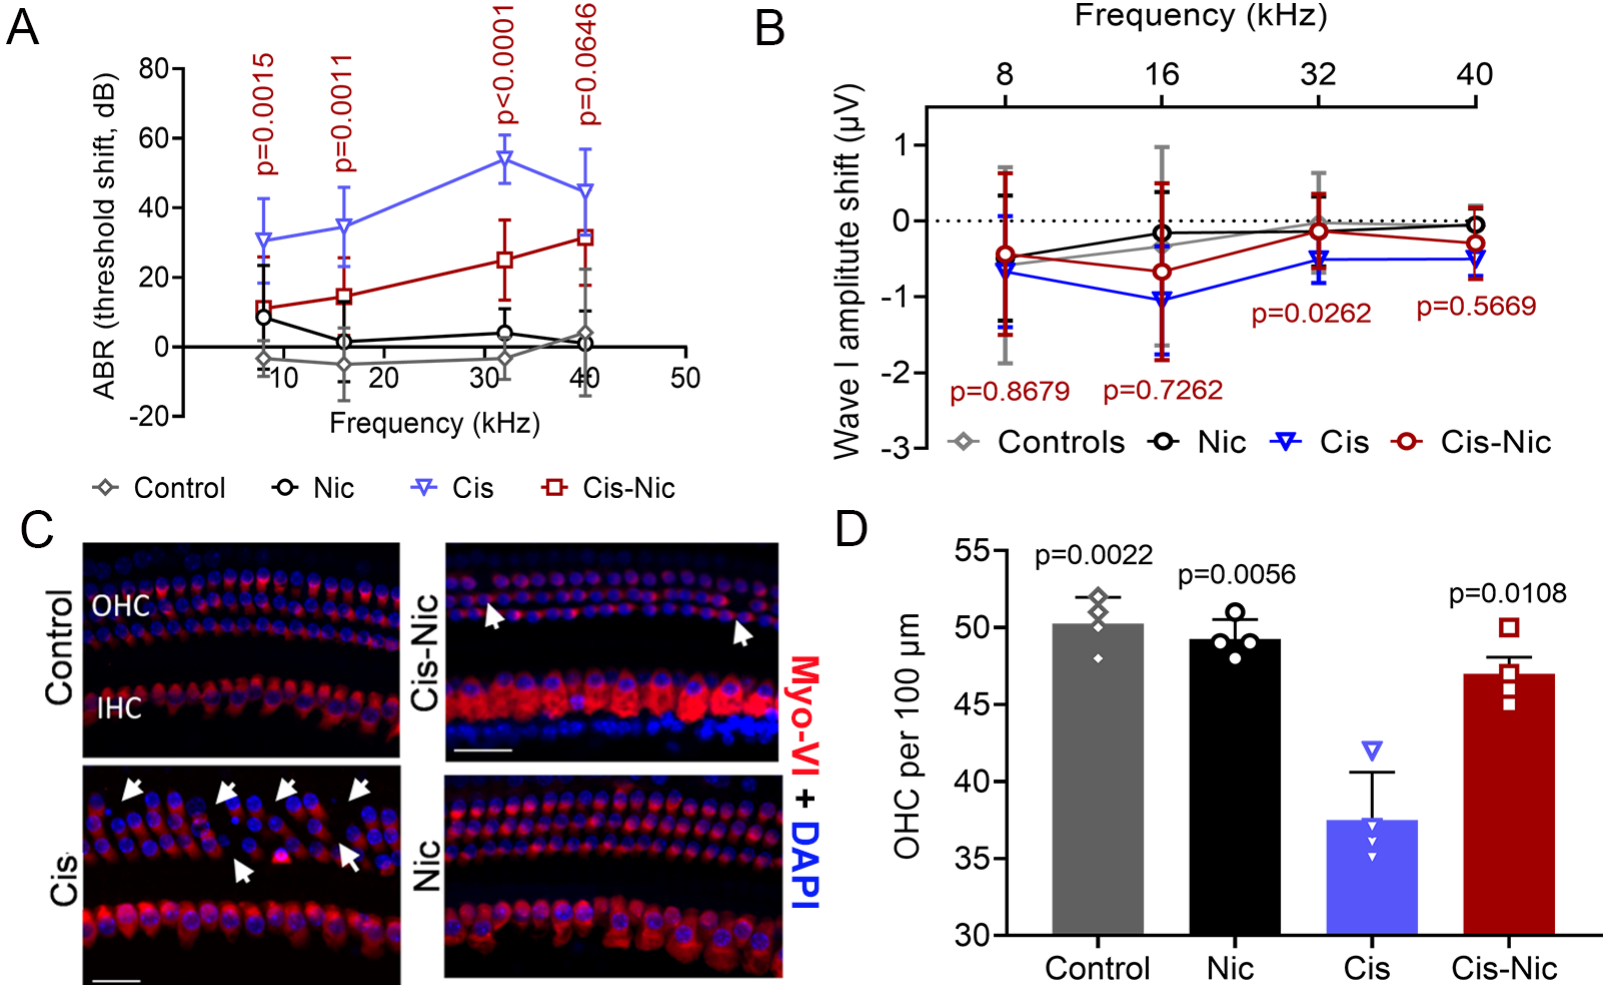

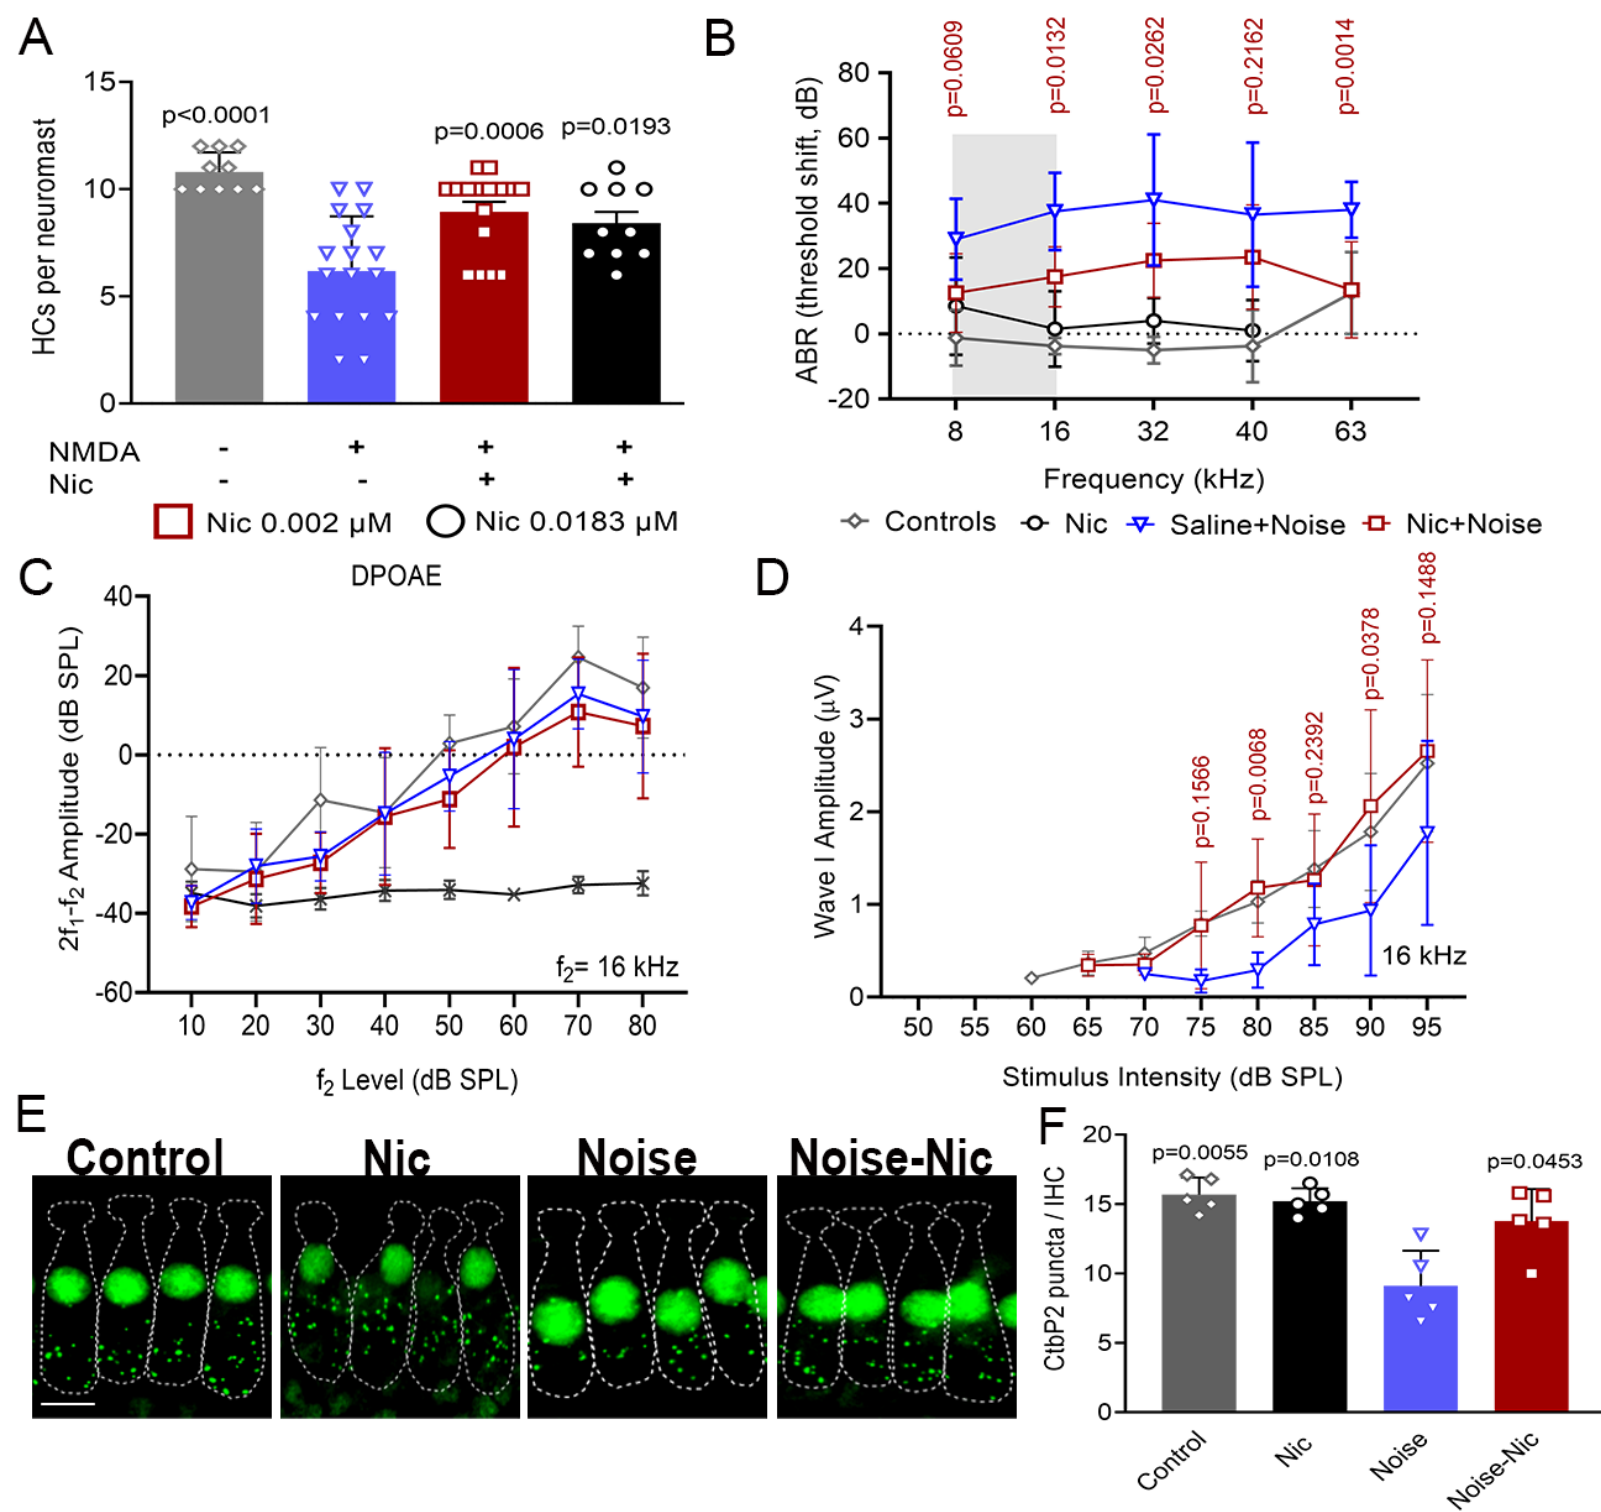

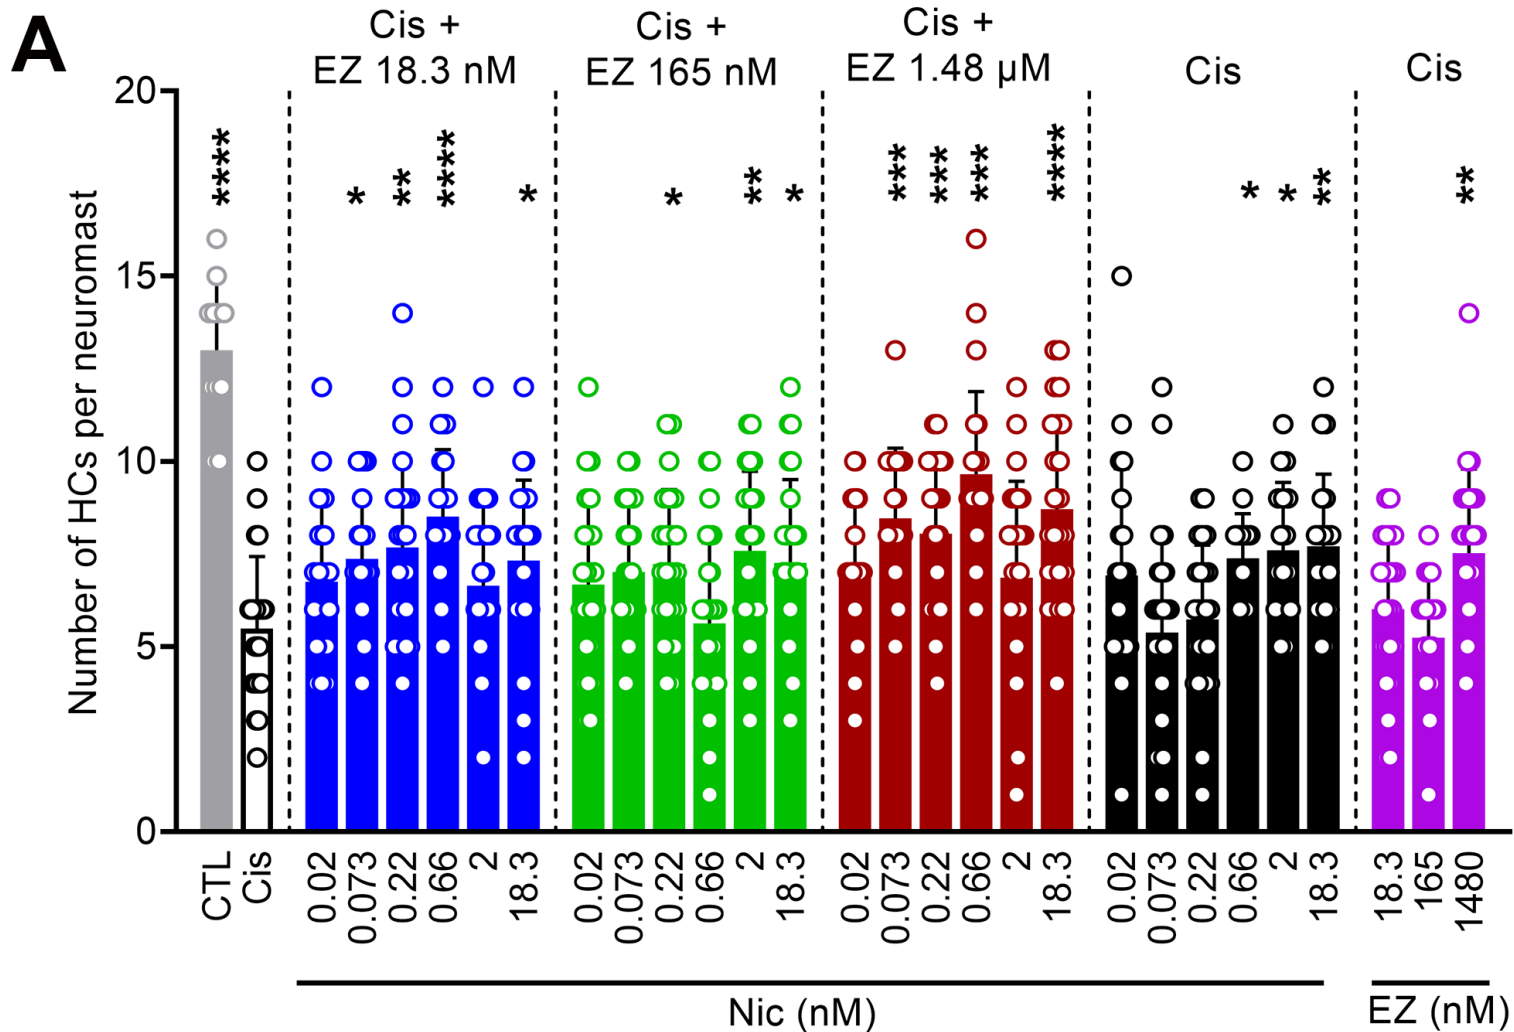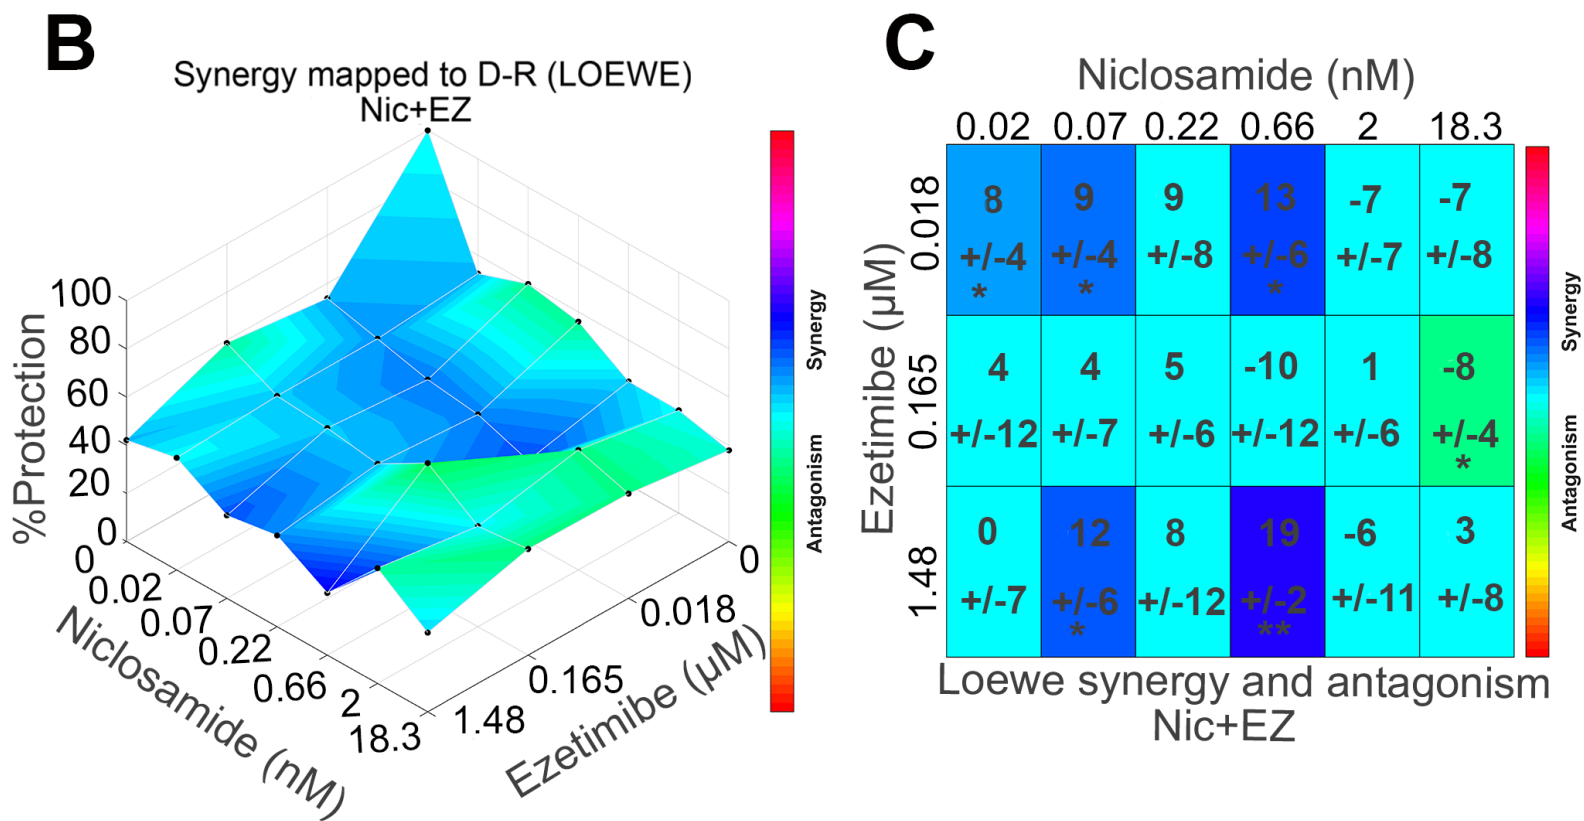

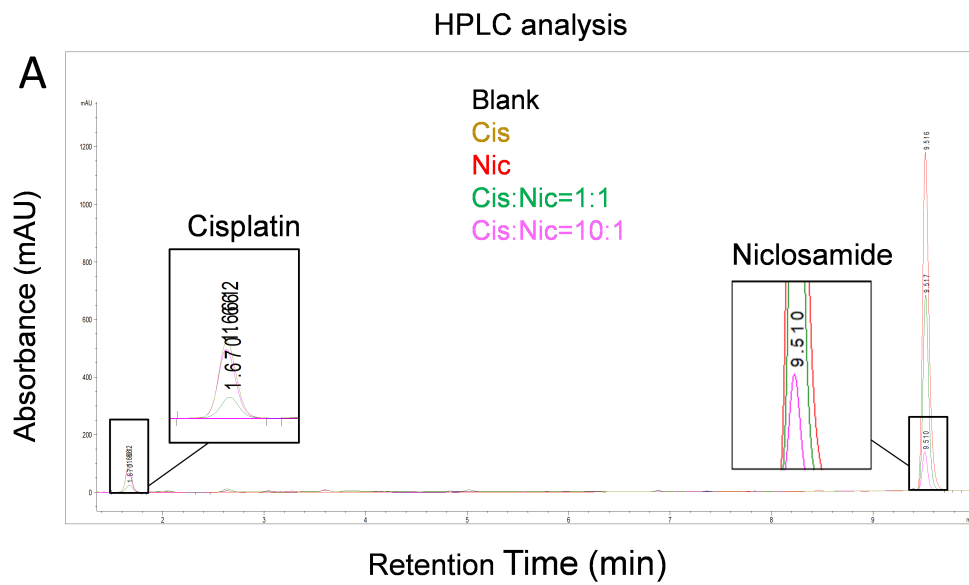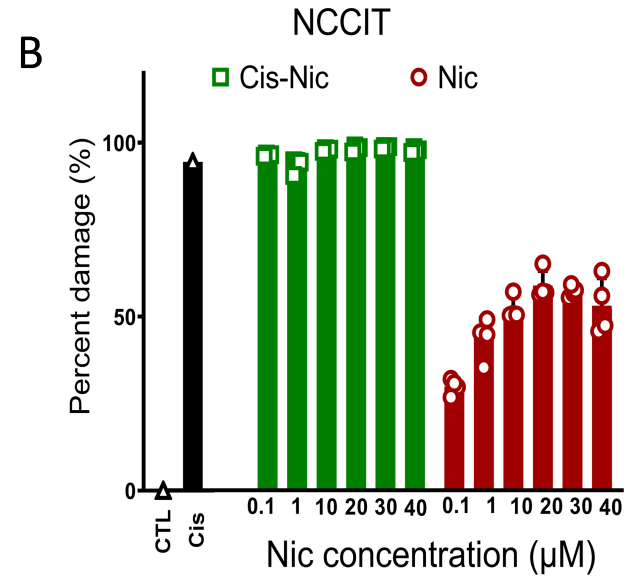

**Figure 1. Workflow of *in silico* drug screening and signaling pathway discovery.**

The transcriptomic profiles of cisplatin-resistant cancer cell lines and their parental cisplatin-sensitive cells were accessed in GEO. The individual DEG lists were analyzed using the LINCS and GDA drug-gene interaction databases to identify drug-candidates that could induce the cisplatin-resistant transcriptional profile (blue-shaded box). The combined lists of up- and down-regulated DEGs were analyzed to identify enriched KEGG pathways and subsequent target genes in cisplatin resistance (red-shaded box). Drug-gene targets and pathway-gene targets were compared and used to rank the drug candidates, the top 30 drugs were validated both *in vitro* and *in vivo*, with niclosamide emerging as one of the top-hit compounds. As a complimentary approach, bulk RNA-seq of cisplatin-treated HEI-OC1 cells and GSEA analysis were performed to identify molecular targets to prevent CIHL (gray-shaded box).

**Figure 2. Transcriptome analysis of cisplatin-resistant cancer cell lines reveals implicated pathways and shared gene targets with identified drugs.**

A) Pooled cancer cell line profiles available from the GEO database were analyzed using GSEA to identify enriched molecular pathways from the KEGG database. Upregulated pathways are shown in red on the left, while downregulated pathways are shown in blue on the right. Circle size is directly correlated to the number of the genes mapped to its respective FDR value. B) Gene expression profiles for each drug derived from the iLINCS database were compared to those differentially expressed genes identified by GSEA. Overlapping genes in the same direction were then used to rank drugs. Total overlap counts for genes are included in the red up and blue down columns.

**Figure 3. Validation of 30 experimental compounds reveals niclosamide as the top**

**hit.** A) Lowest level of caspase-3/7 activity in HEI-OC1 cells treated with cisplatin (50  $\mu$ M) and experimental compounds. Caspase reads were normalized to cells treated with cisplatin/DMSO (as 100%) and cells treated with 1% DMSO (as 0%). Niclosamide reduced caspase activity to comparable levels as control cells at a dose of 4.4  $\mu$ M. Data are shown as mean  $\pm$  SD (n=3 wells per treatment). \*P <0.05, one-way ANOVA versus cisplatin, followed by Dunnett's multiple comparison test. B) Highest level of protection in zebrafish treated with cisplatin and experimental compounds quantified by HC count. Quantification of the HCs revealed significantly reduced cisplatin damage in zebrafish pretreated with 0.002  $\mu$ M niclosamide (n=5 per group, \*P <0.05, one-way ANOVA versus cisplatin-only, followed by Dunnett's multiple comparison test). C) Representative images of zebrafish neuromasts. Niclosamide reduced HC loss at concentrations ranging from 0.002  $\mu$ M-1.48  $\mu$ M. GFP = green, otoferlin = red (scale bar = 20  $\mu$ m). D, E) Dose response curves of niclosamide with (D) and without (E) cisplatin in HEI-OC1 cells. Results are presented as mean  $\pm$  SD. F) Niclosamide protects against cisplatin ototoxicity across multiple doses in zebrafish (n=5 per group, one-way ANOVA versus cisplatin-only (red) or versus control (black), followed by Dunnett's multiple comparison test). Data are shown as mean  $\pm$  SD.

**Figure 4. Niclosamide demonstrates otoprotective effects against cisplatin *in vivo*.**

A) Niclosamide-treated animals have significantly reduced ABR threshold shifts at 8, 12, and 32 kHz as compared to cisplatin-only treated mice (n=8 per group, two-way ANOVA versus cisplatin-only treatment, followed by Tukey's multiple comparison test). B) Wave I amplitude shifts. Animals exposed to cisplatin and treated with niclosamide showed a

significant reduction in wave I amplitude shifts at 32 kHz compared to cisplatin-only treated animals (n=8 per group, one-way ANOVA versus cisplatin treatment, followed by Tukey's multiple comparison test). C) Representative immunofluorescent images of the mid-basal region of the cochlea stained for Myosin-VI (red) and DAPI (blue) showing minimal levels of hair cell loss when animals were cotreated with cisplatin and niclosamide compared to cisplatin-only treated animals. White arrows denote missing hair cells (scale bar = 20  $\mu$ m). D) Quantification of outer hair cells from immunofluorescent images shows that cotreatment with niclosamide grants full protection against cisplatin-induced hair cell loss (n=5 per group, one-way ANOVA versus cisplatin, followed by Dunnett's multiple comparisons test). Data shown as mean  $\pm$  SD.

**Figure 5. Niclosamide protects against NIHL.** A) Niclosamide reduces NMDA excitotoxicity in zebrafish neuromasts. Zebrafish were treated with 300  $\mu$ M NMDA (25) followed by 0.002 or 0.0183  $\mu$ M niclosamide. At both doses tested, niclosamide's treatment showed a significantly increase in the number of hair cells compared to NMDA-only treated zebrafish. (n=5 per group, p values were calculated against NMDA-only, one-way ANOVA, Dunnett's multiple comparisons test). B) Noise-exposed mice treated with niclosamide had significantly lower ABR threshold shifts compared to saline-treated animals (n=8 per group, two-way ANOVA versus noise-only treatment, followed by Sidak's multiple comparisons test). C) There were no differences in DPOAE amplitudes across all groups from 10-70 dB SPL (n=8 per group, two-way ANOVA, followed by Sidak's multiple comparisons test). D) Niclosamide-treated mice showed comparable wave-1 amplitudes across 65-90 dB SPL to age-matched controls and significantly higher wave-I amplitudes at 80- and 90-dB SPL than saline and noise-

exposed mice (n=8 per group, two-way ANOVA, followed by Tukey's multiple comparisons test versus noise). E) CtBP2 staining (green) showed that niclosamide protects against synaptic loss after noise exposure. F) Quantification of CtBP2 puncta per inner hair cell (n=4 per group, one-way ANOVA versus noise-only treatment, followed by Dunnett's multiple comparisons test). Data shown as mean  $\pm$  SD.

**Figure 6. Niclosamide shows synergistic effects with the Nrf2 agonist, ezetimibe.**

A) Cotreatment of niclosamide with the Nrf2 agonist, ezetimibe, demonstrates an increased in hair cell protection. Zebrafish were treated with combinations of niclosamide (0.02-18.3 nM) and EZ (0.0183-13.3  $\mu$ M). Ezetimibe alone + cisplatin showed higher HC counts at 1.48  $\mu$ M, while niclosamide alone + cisplatin showed higher hair cell counts at concentrations equal or lower than 2 nM. However, combining both compounds showed significantly higher hair cell counts across a much lower range of doses for both niclosamide and ezetimibe (n=5 per group, p values were calculated against cisplatin-only, one-way ANOVA, followed by Dunnett's multiple comparisons test). B, C) Niclosamide and ezetimibe show synergistic/additive otoprotection in zebrafish. A three-dimensional plot (B) showing dose response protection in zebrafish. Loewe synergy and antagonism scores (C) calculated for each combination of doses indicate a highest synergistic activity with 0.66 nM niclosamide and 1.48  $\mu$ M ezetimibe (n=5 per group). Other dose combinations showing synergy are shown in dark blue boxes. Dose combinations with scores of 0 and 1 show additive effect. \* $P < 5 \times 10^{-2}$ ; \*\* $P < 10^{-3}$ , \*\*\* $P < 10^{-4}$  versus control fish, One-sample t-test run by the Combenefit software (33,34). Data is shown as mean  $\pm$  SD



**Figure 7. Niclosamide does not interact with cisplatin.** A) HPLC analysis demonstrate that there is no chemical interaction between cisplatin and niclosamide at various concentrations. B) NCCIT cancer cells were used in a viability test to show that niclosamide (0.1-40  $\mu$ M) does not inhibit cisplatin anti-cancer activity.

| <b>Study number</b> | <b>GSE number</b> | <b>Cell line</b> | <b>Pubmed ID</b> |
|---------------------|-------------------|------------------|------------------|
| <b>1A</b>           | GSE14231          | 833K             | PMC2877824       |
| <b>1B</b>           | GSE14231          | GCT27            | PMC2877825       |
| <b>1C</b>           | GSE14231          | Susa             | PMC2877826       |
| <b>2</b>            | GSE15372          | A2780            | PMC2712480       |
| <b>3</b>            | GSE21656          | H460             | PMC3271860       |
| <b>4</b>            | GSE23554          | OVCA             | PMC3186862       |
| <b>6</b>            | GSE33482          | A2780            |                  |
| <b>7</b>            | GSE45553          | OVCAR-8C         | PMC4795743       |
| <b>8</b>            | GSE102787         | UM-SCC           | PMC5588726       |
| <b>9</b>            | GSE108214         | A549             | PMC2877824       |
| <b>12A</b>          | GSE129692         | A2780            | PMC7226299       |
| <b>12B</b>          | GSE129692         | H23              | PMC7226300       |
| <b>12C</b>          | GSE129692         | H460             | PMC7226301       |
| <b>12D</b>          | GSE129692         | OVCAR3           | PMC7226302       |

**Figure 1-table supplement 1. GEO studies of cisplatin-resistant cancer cell lines.**

02001122416  
of Kessler-Laboratory

Overlapping upregulated genes/pathways

Overlapping downregulated genes/pathways

Genes up and down across GBO studies

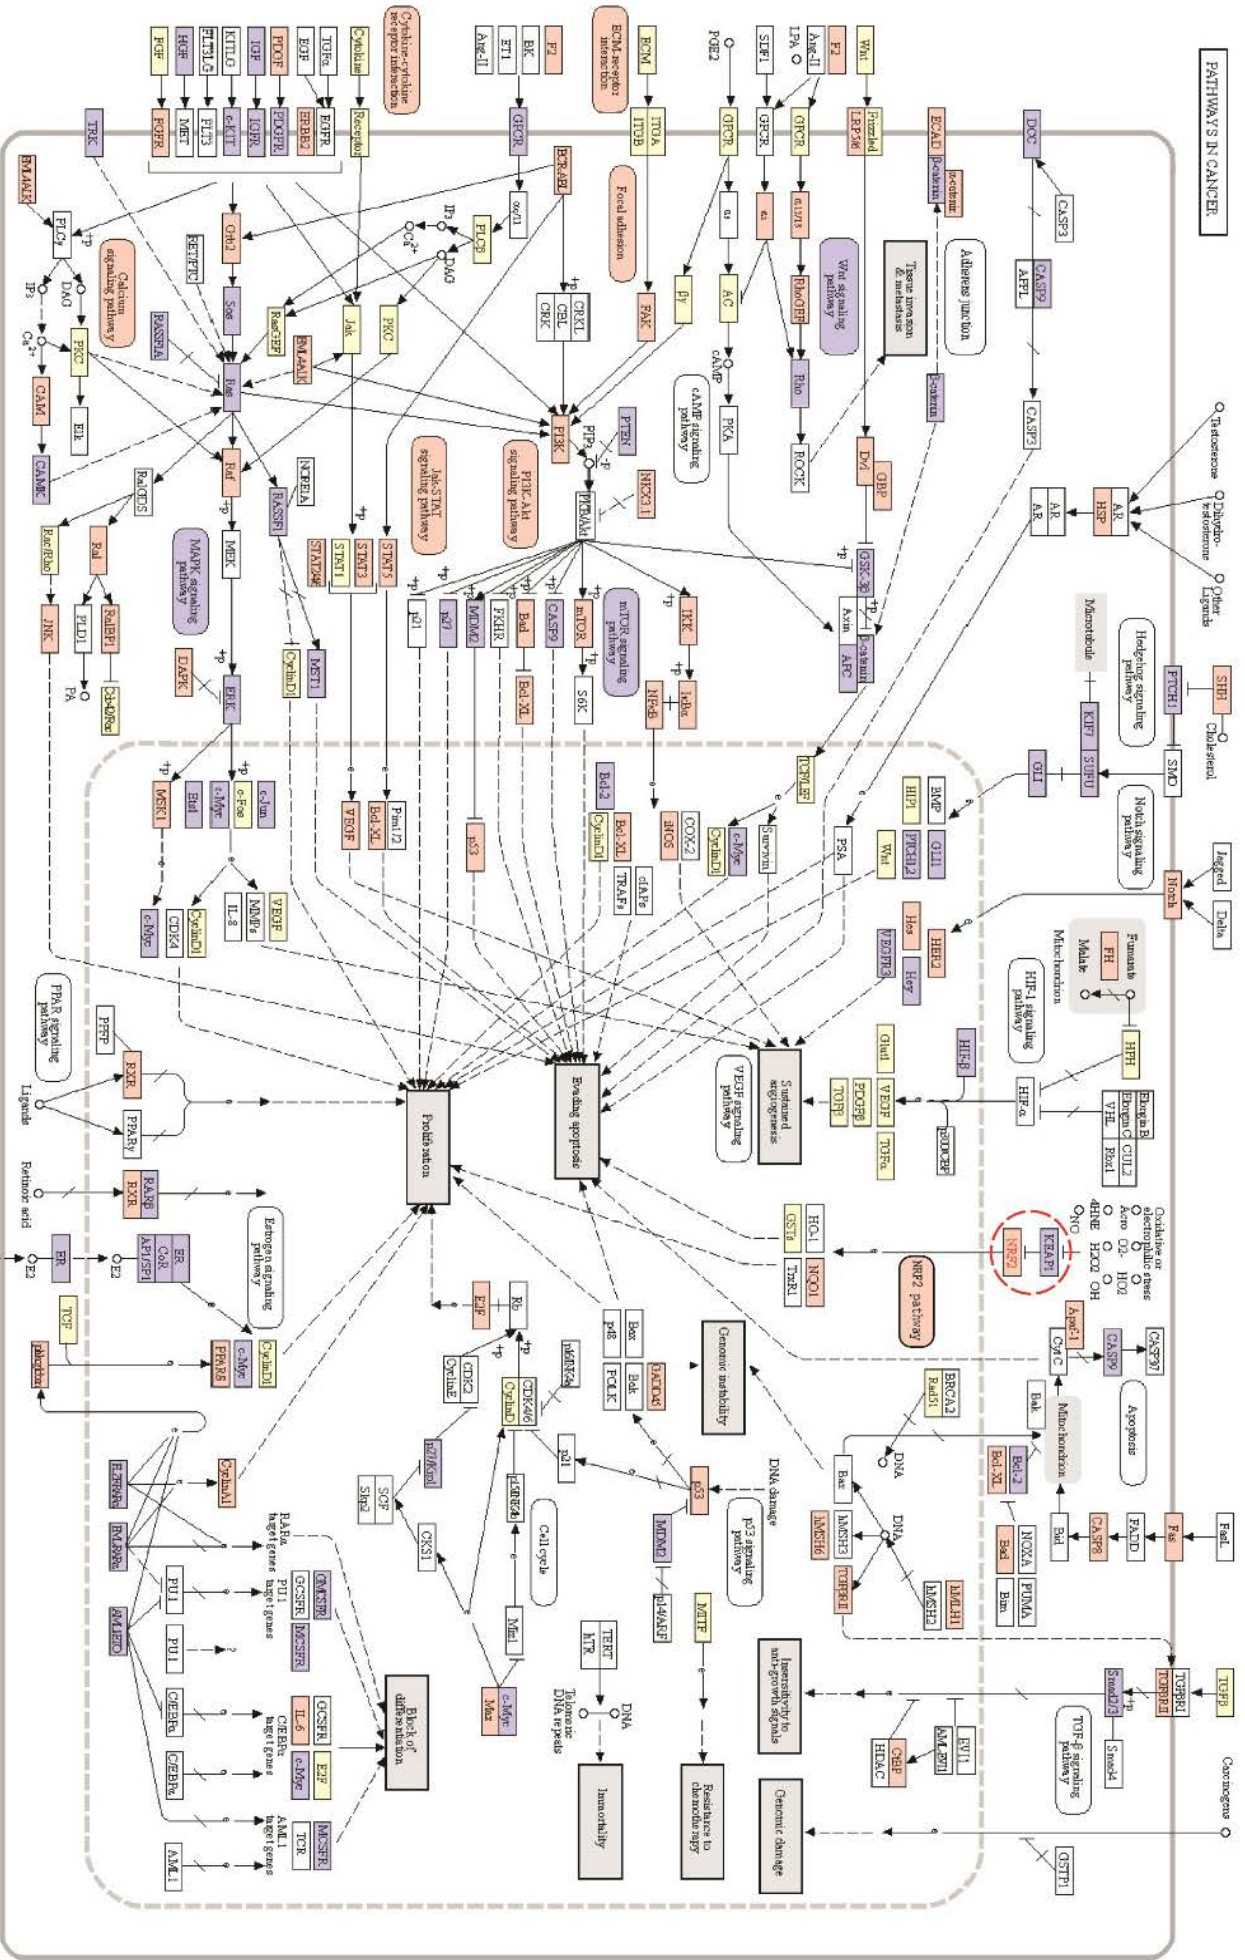

**Figure 2-figure supplement 1. GSEA analysis of KEGG enriched molecular pathways of cisplatin-resistant cancer cells showed overlap with several pro-survival pathways. Overlapping DEG profiles in the cisplatin-resistant cancer cell lines and enrichment in pro-survival pathways, including the Nrf2 pathway (red circle), suggests several molecular mechanisms underlying cisplatin resistance.**

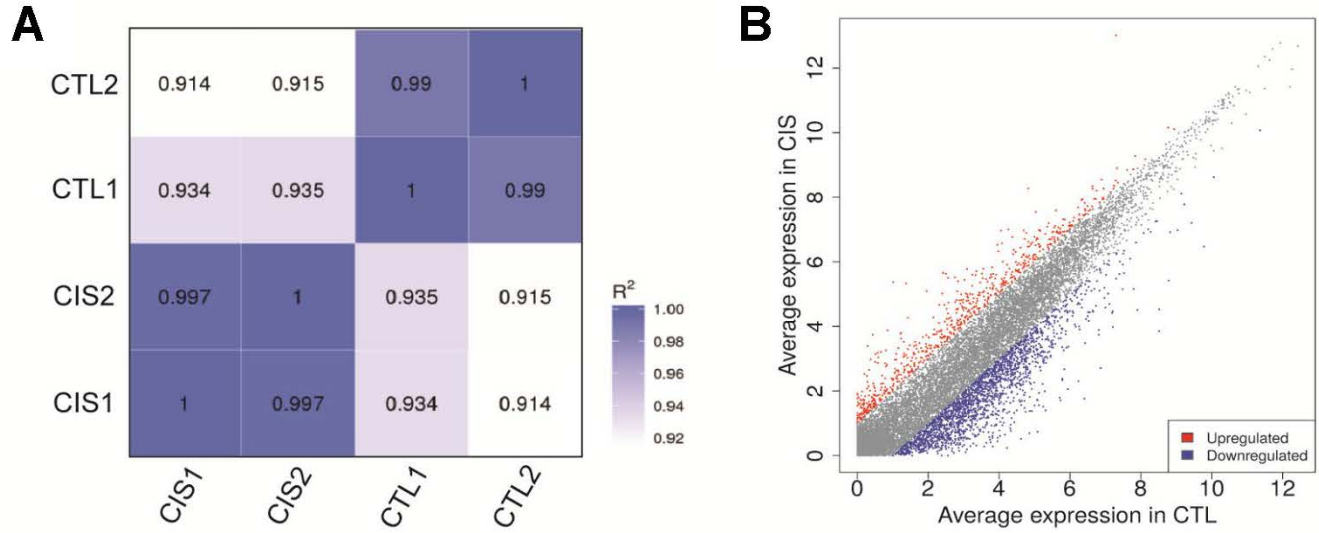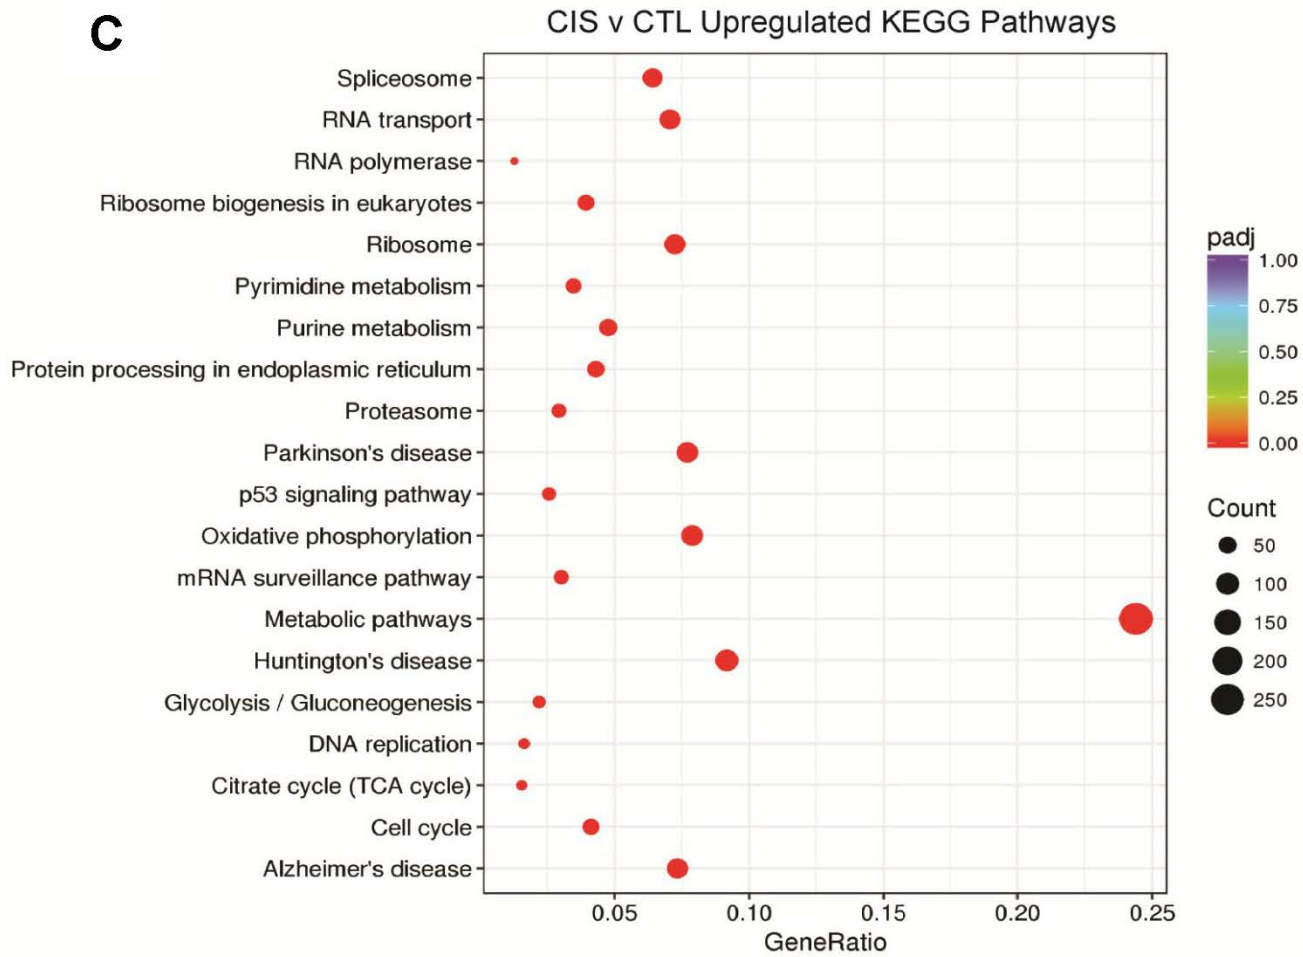

**D**

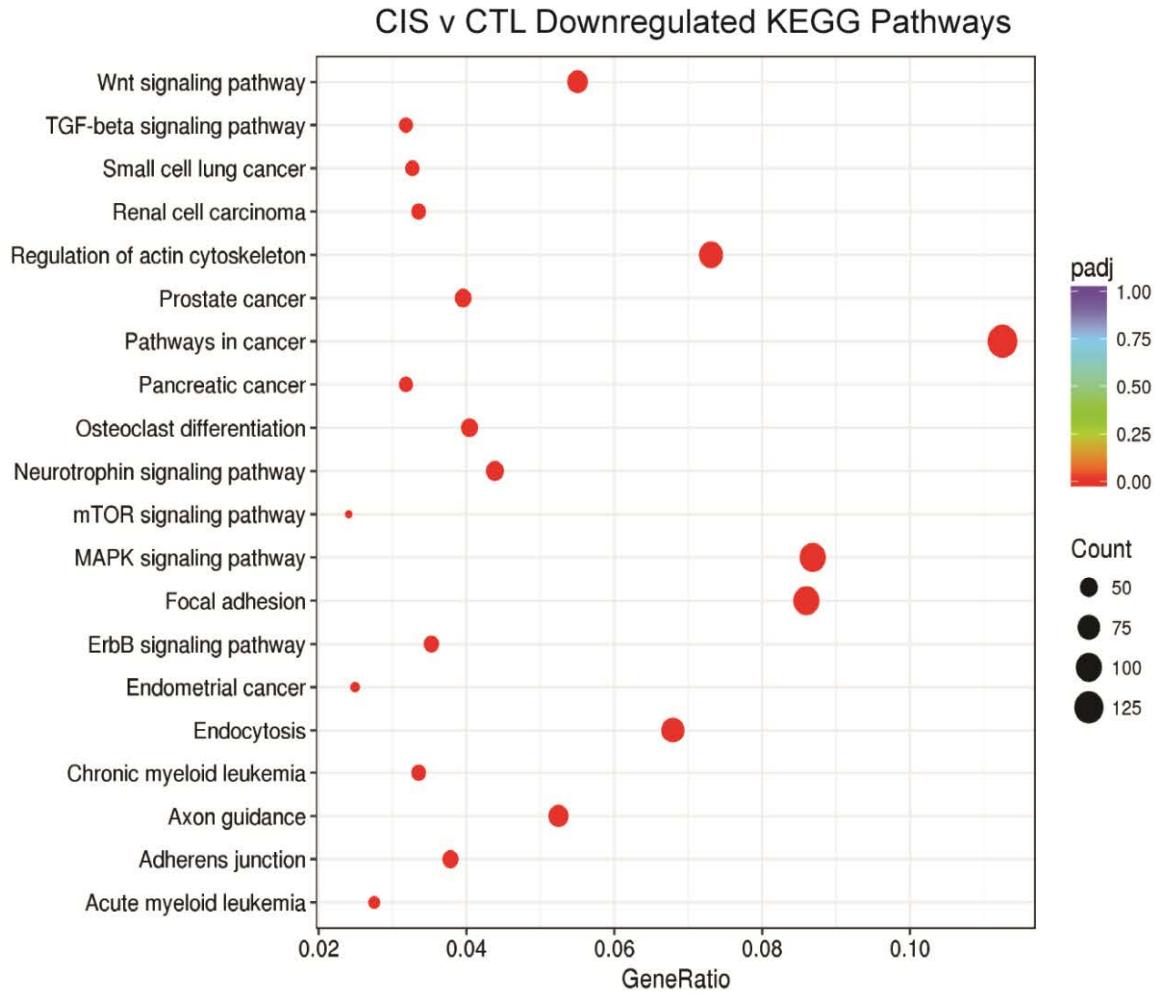

**E**

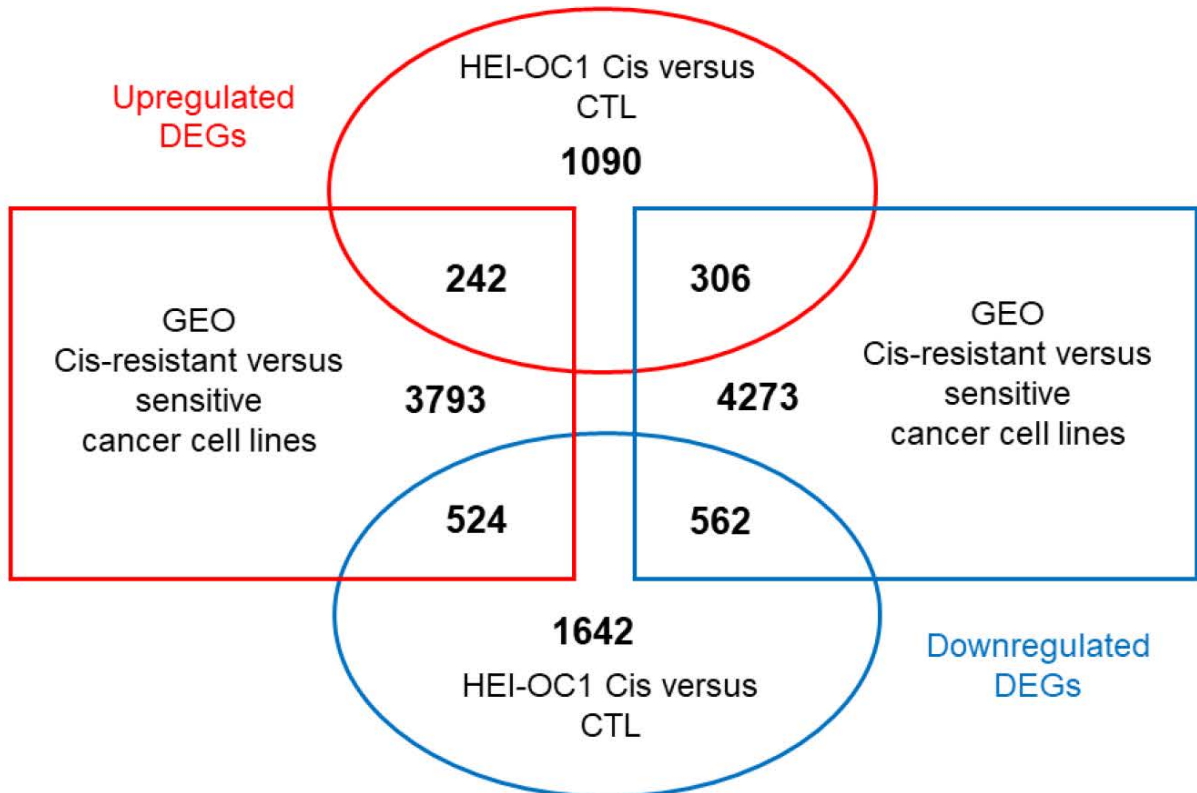

**Figure 2-figure supplement 2. RNA-seq analysis of cisplatin-treated HEI-OC1 cells.** (A) Pearson's correlation matrix of cisplatin-treated (CIS) and untreated control (CTL) samples. (B) Scatter plot of differentially expressed genes in cisplatin-treated and control HEI-OC1 cells. (C) Upregulated and (D) downregulated KEGG pathways in cisplatin-treated HEI-OC1 cells. X-axis represents the ratio of differentially expressed genes to all themes annotated for this gene ontology (GO) term. Color scale represents the adjusted p-value (padj). Dot size represents the number of differentially expressed genes associated with that particular GO term. (E) Representation of up- and down-regulated gene overlaps from the GEO cancer cell data and HEI-OC1 cells.

**A**

| Upregulated pathways/genes        | GEO Cancer cell lines resistant vs sensitive DOWN | HEI-OC1 CIS vs CTL UP | Overlap | Total genes in KEGG database |
|-----------------------------------|---------------------------------------------------|-----------------------|---------|------------------------------|
| Ribosome                          | 20                                                | 79                    | 14      | 130                          |
| RNA transport                     | 32                                                | 77                    | 15      | 172                          |
| Ribosome biogenesis in eukaryotes | 13                                                | 43                    | 9       | 73                           |
| Metabolic pathways                | 192                                               | 266                   | 32      | 1720                         |
| Protein processing in ER          | 31                                                | 47                    | 6       | 197                          |

**B**

| Downregulated pathways/genes                                                                                           | GEO Cancer cell lines resistant vs sensitive UP | HEI-OC1 CIS vs CTL DOWN | Overlap | Total genes in KEGG database |
|------------------------------------------------------------------------------------------------------------------------|-------------------------------------------------|-------------------------|---------|------------------------------|
| Focal adhesion                                                                                                         | 50                                              | 100                     | 19      | 200                          |
| Pathways in cancer (Includes NRF2)                                                                                     | 101                                             | 131                     | 32      | 542                          |
| Regulation of actin cytoskeleton                                                                                       | 47                                              | 85                      | 20      | 219                          |
| ErbB signaling pathway                                                                                                 | 22                                              | 41                      | 13      | 84                           |
| <i>Those below were not shown in the top 20 pathways in Fig S2, but were enriched pathways in the HEI-OC1 analysis</i> |                                                 |                         |         |                              |
| Fc gamma R-mediated phagocytosis                                                                                       | 24                                              | 37                      | 9       | 92                           |
| T cell receptor signaling pathway                                                                                      | 26                                              | 41                      | 12      | 103                          |
| Chemokine signaling pathway                                                                                            | 51                                              | 59                      | 21      | 189                          |
| Tight junction                                                                                                         | 40                                              | 47                      | 8       | 163                          |
| Leukocyte transendothelial migration                                                                                   | 28                                              | 38                      | 14      | 114                          |
| Jak-STAT signaling pathway                                                                                             | 41                                              | 43                      | 9       | 168                          |
| Bacterial invasion of epithelial cells                                                                                 | 29                                              | 23                      | 11      | 76                           |
| Toll-like receptor signaling pathway                                                                                   | 26                                              | 27                      | 8       | 99                           |

Figure 2-table supplement 2. Pathways and gene overlaps between GEO cancer cell lines and HEI-OC1. A) Comparisons of the pathways/genes that are downregulated in the cisplatin-resistance cancer cell lines while upregulated in the cisplatin-treated HEI-OC1 cells. B) Comparison of the pathways/genes that are upregulated in the cisplatin-resistant cells but downregulated in the cisplatin-treated HEI-OC1 cells. These pathways are likely to confer resistance to cisplatin-induced cell death.



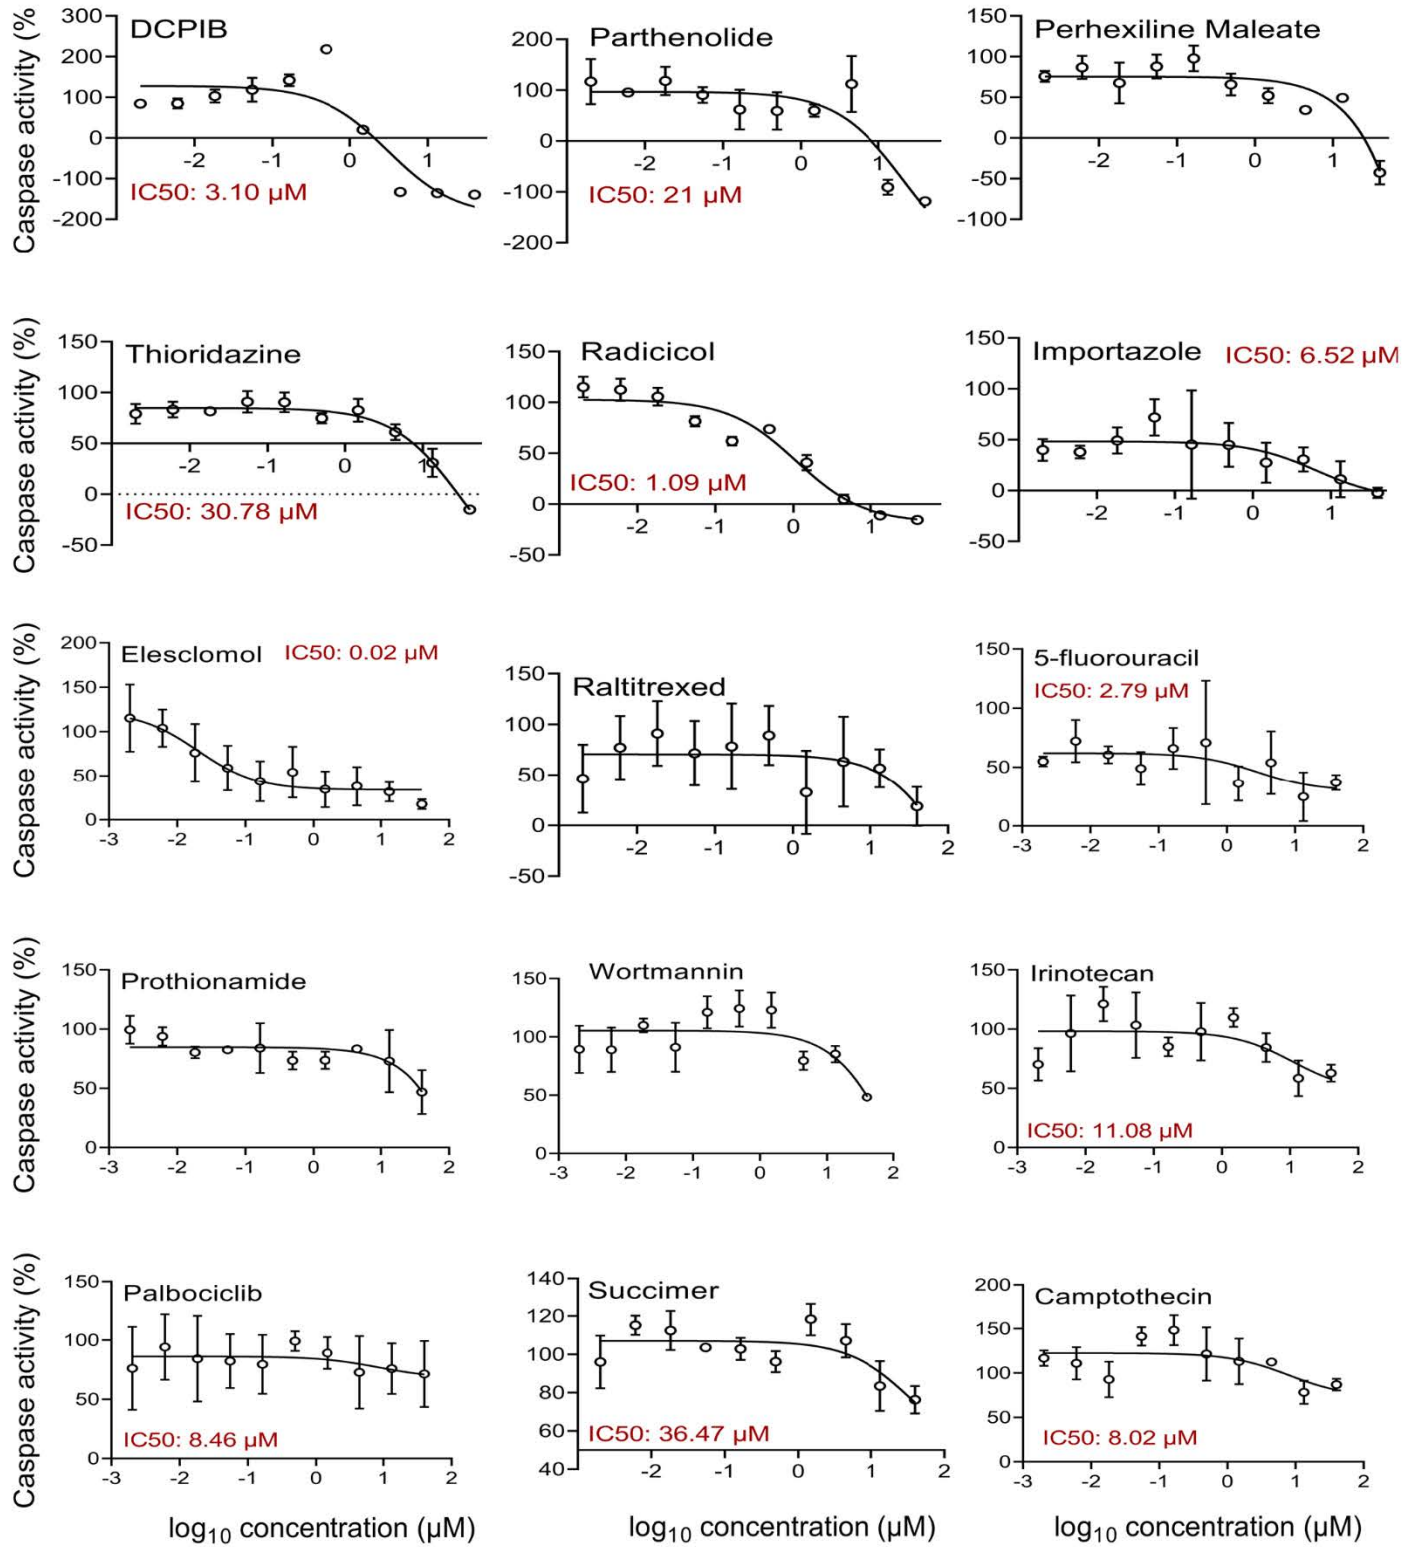

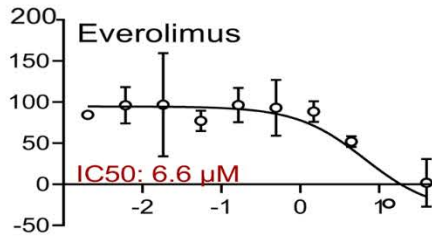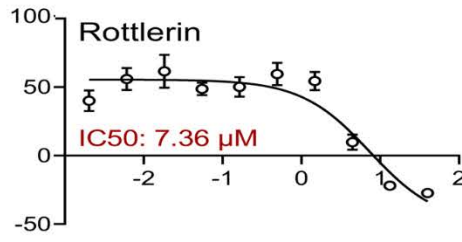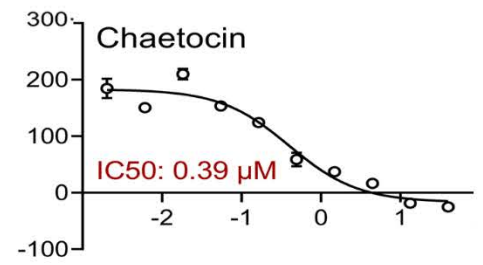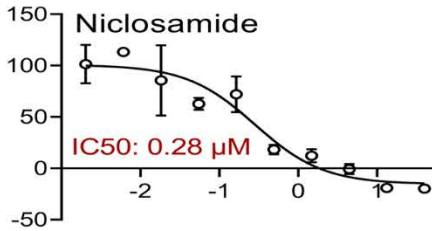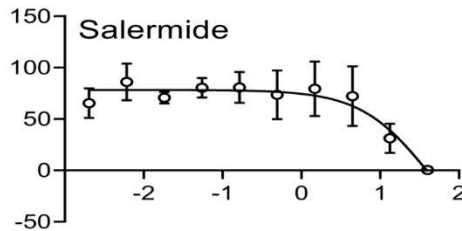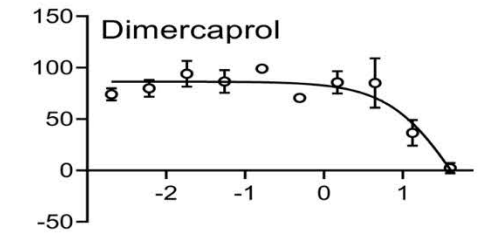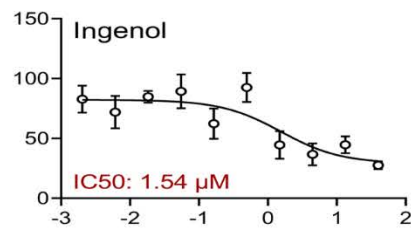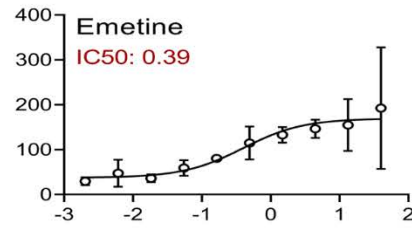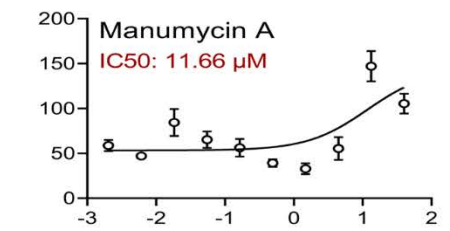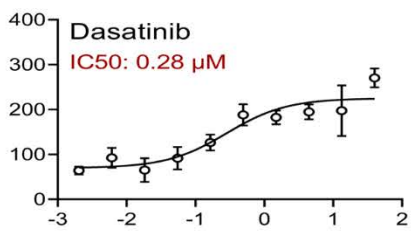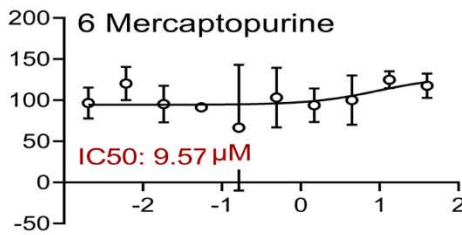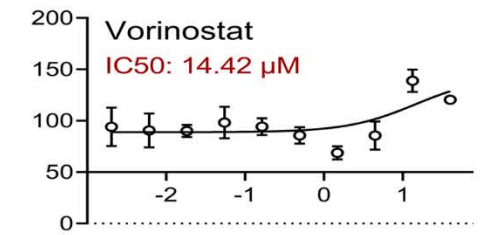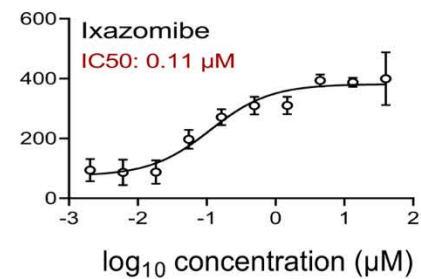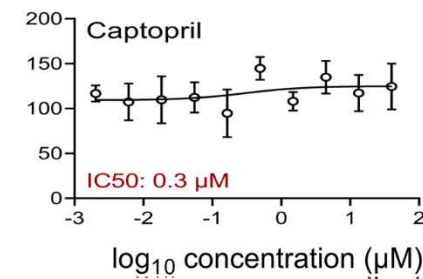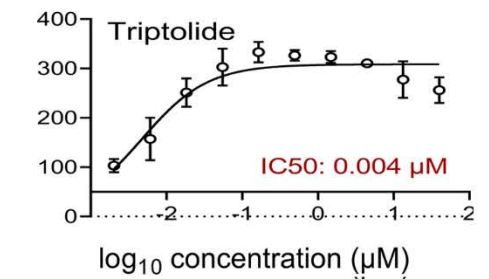

**Figure 3-figure supplement 1. Dose-response curves for the top 30 experimental compounds.** HEI-OC1 cells were exposed to cisplatin and various concentrations of the corresponding compounds. Caspase-3/7 activity was measured and plotted as a function of log<sub>10</sub> compound concentration (μM). Caspase activity for all the treatments was normalized to cells treated only with cisplatin. Whenever possible, IC<sub>50</sub>s were calculated using GraphPad Prism software. Mean ± standard error (n=3 per group).

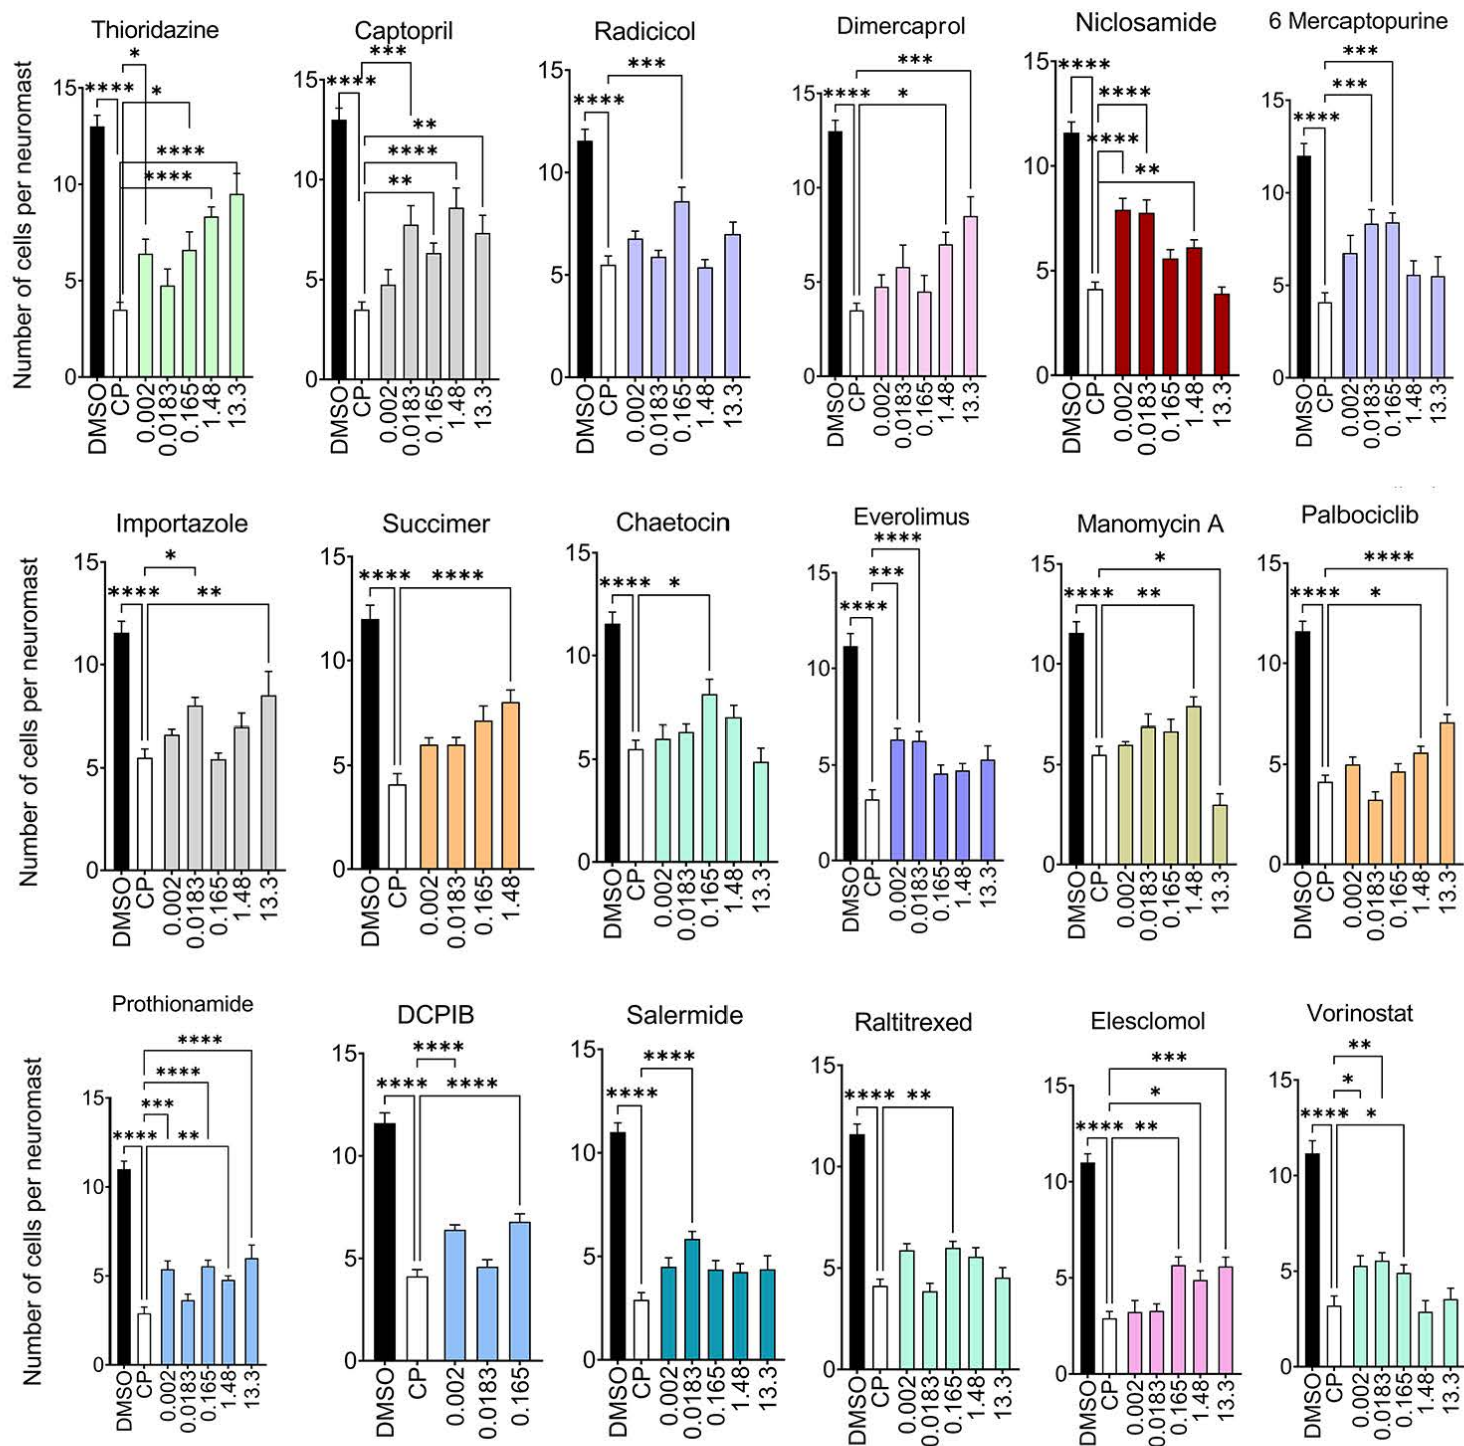

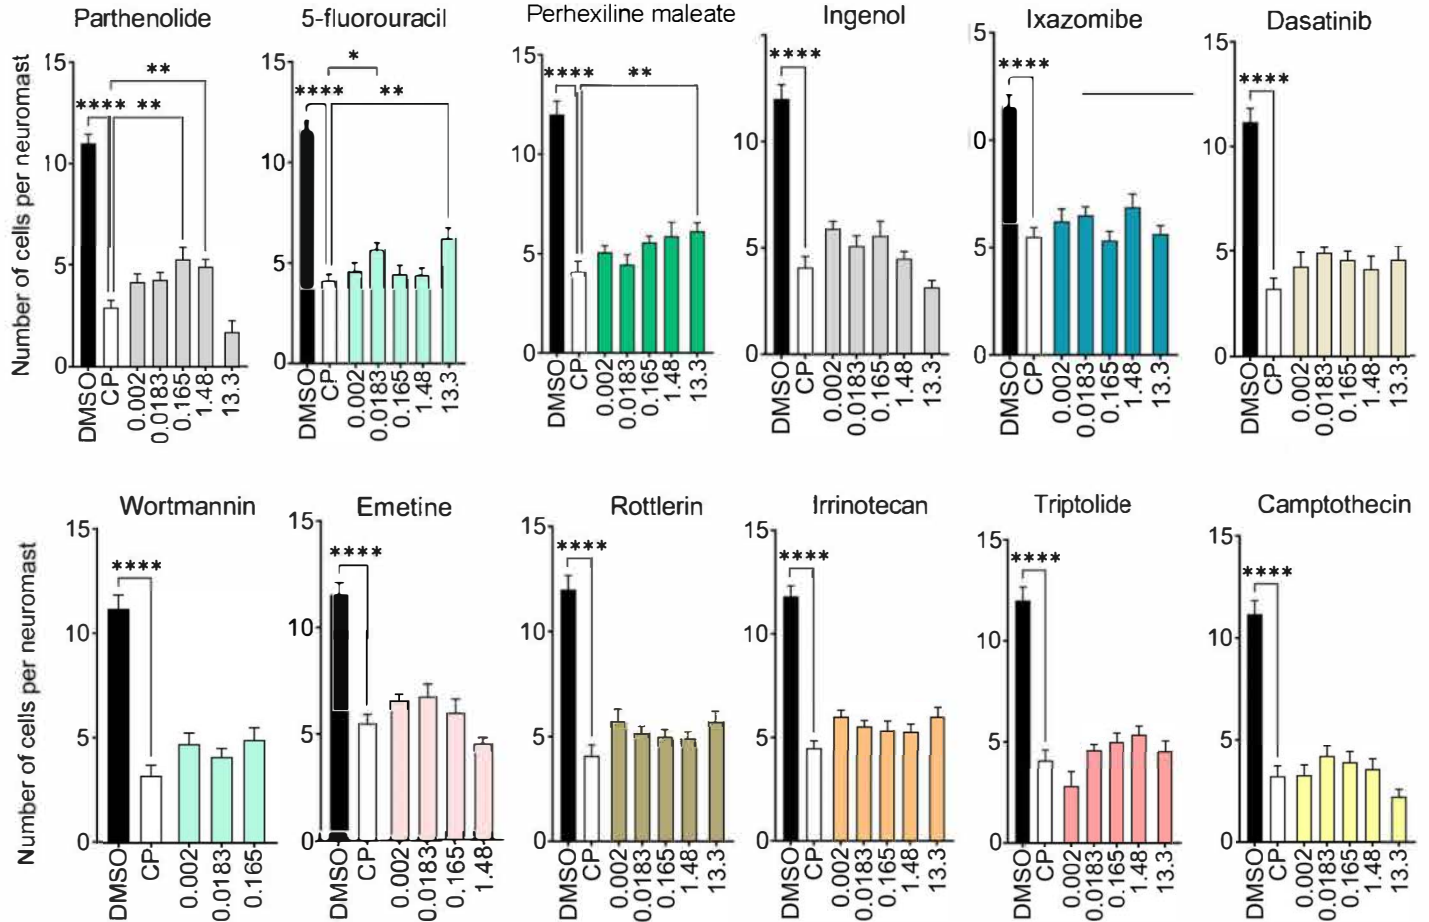

**Figure 3-figure supplement 2. Characterization of the top 30 candidates in an *in vivo* model for cisplatin ototoxicity.** Zebrafish were co-incubated with cisplatin and the 30 candidates at various concentrations as shown. Neuromast HCs were quantified and compared to cisplatin-only treated zebrafish. \*  $P < 0.05$ , \*\*  $P < 0.01$ , \*\*\*  $P < 0.001$ , \*\*\*\*  $P < 0.0001$  versus cisplatin alone (one-way ANOVA followed by Dunnett's multiple comparison test). Data shown as mean  $\pm$  standard error (n=5 per group).

HEI-OC1 cells

Zebrafish

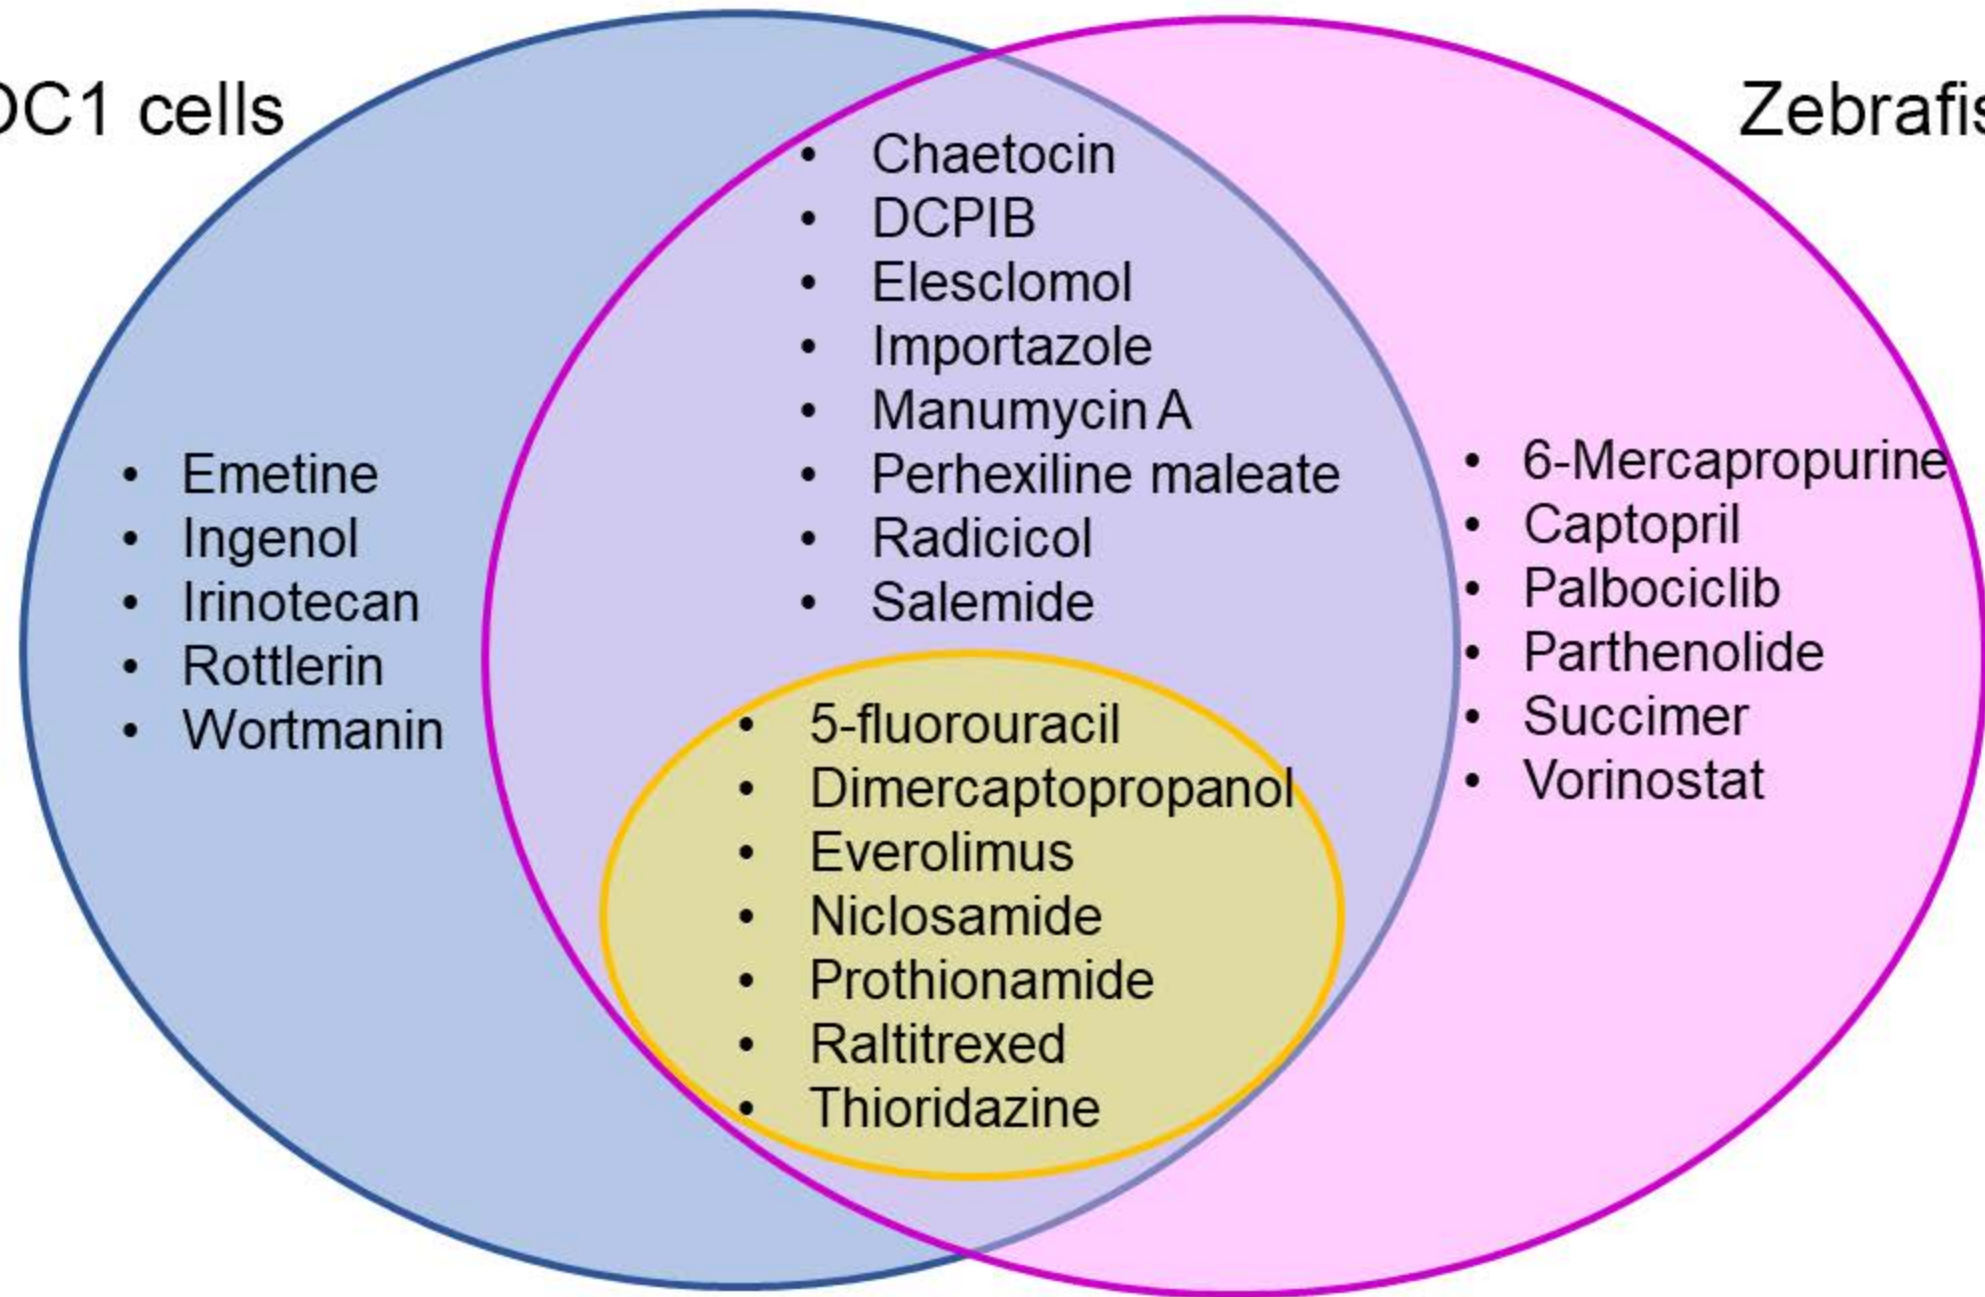

**Figure 3-figure supplement 3. Analysis of the protective compounds identified in vitro in HEI-OC1 cells and in vivo in zebrafish experiments.** Venn diagram showing the protective compounds identified in the two different screenings and the ones common to both assays. Experiments with HEI-OC1 identified 20 compounds with significant levels of protection (blue) while zebrafish experiments identified 21 compounds (pink). Fifteen compounds were commonly identified in both assays, with seven already approved by the FDA for other pathological conditions (yellow).

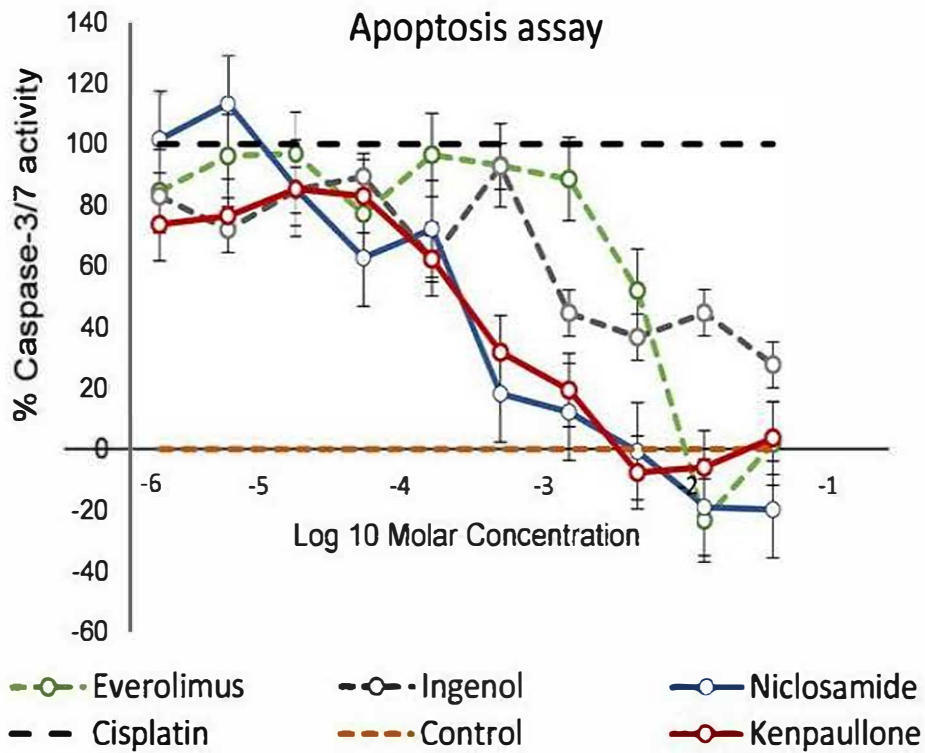

**Figure 3-figure supplement 4. Comparison between niclosamide and everolimus, ingenol and kenpauillone.** The protective effect of niclosamide was compared against two FDA-approved drugs (everolimus and ingenol) as well as against kenpauillone that was identified in our previous screening.



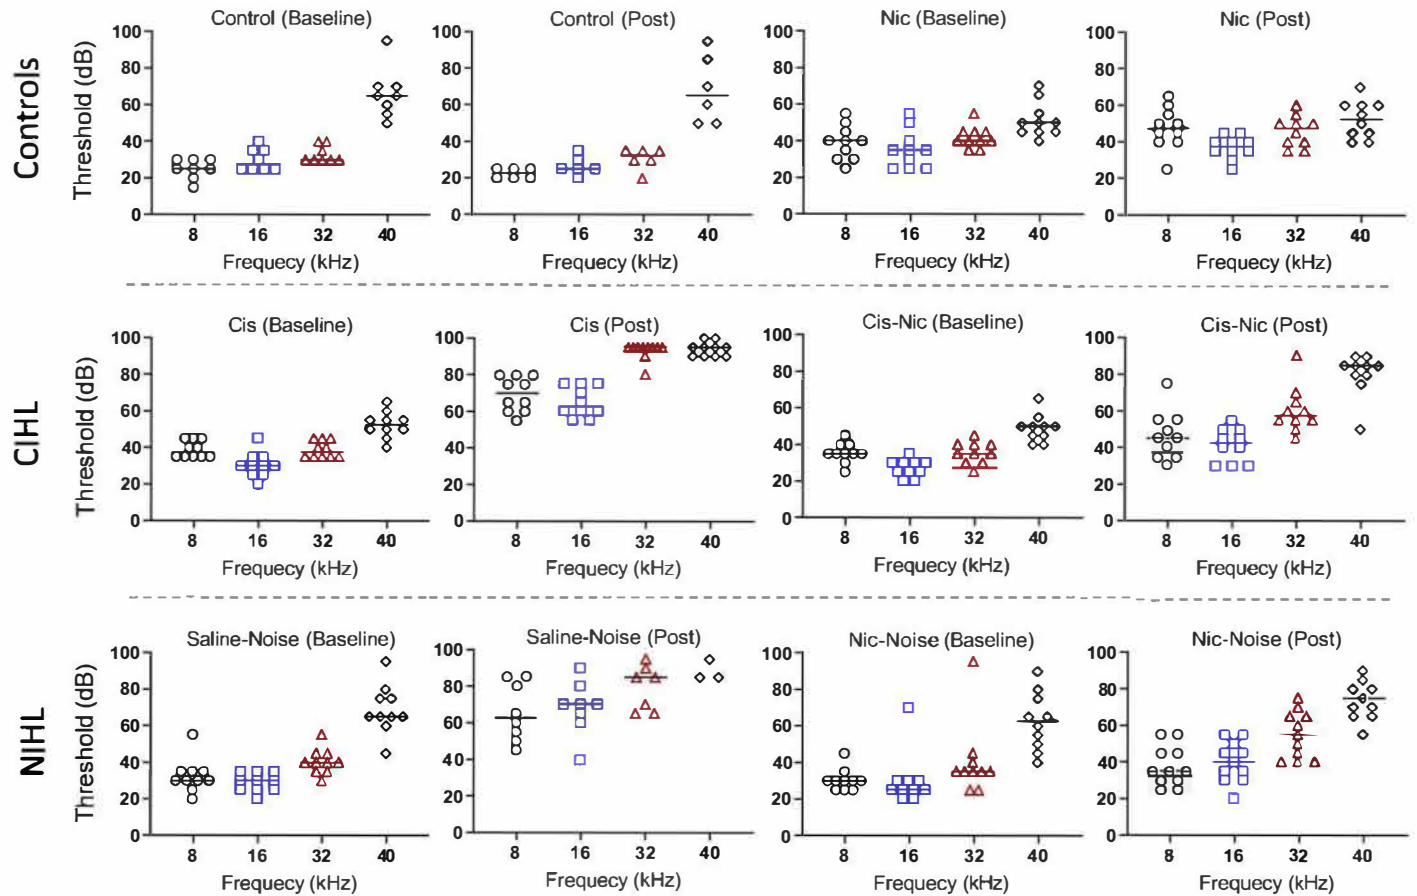

**Figure 4-figure supplement 1. Individual ABR thresholds.** ABR thresholds from control (top row), cisplatin-treated (middle row), and noise-exposed (bottom row) animals at four different frequencies. Mice were also treated with vehicle or niclosamide 10 mg/kg for four consecutive days. Data shown as mean  $\pm$  standard error.

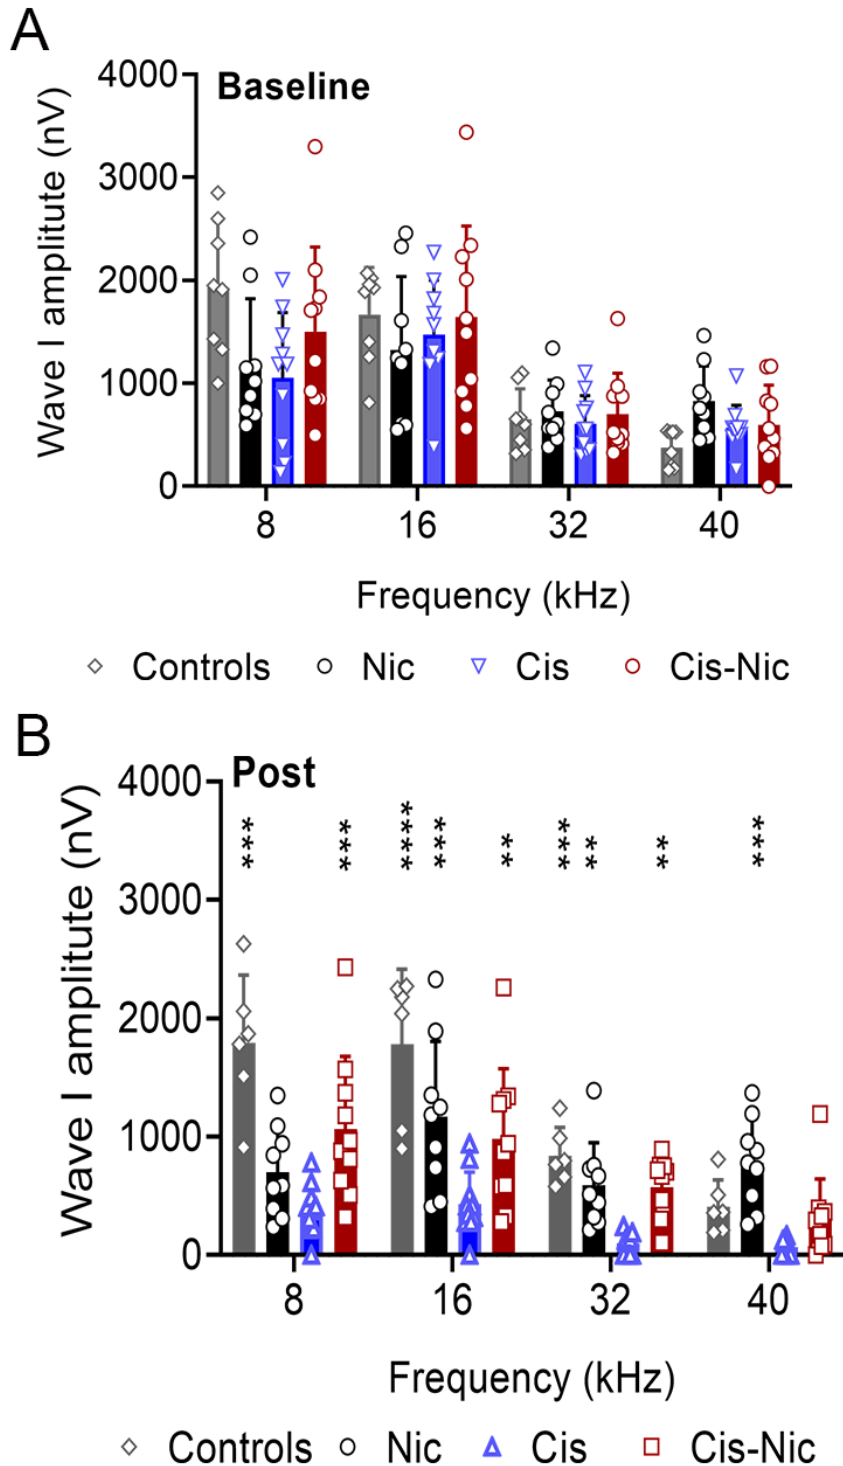

**Figure 4-supplement figure 2. Niclosamide protects against cisplatin *in vivo*.** Wave I amplitudes at baseline (A) showed no differences across all four groups. After cisplatin exposure (B), niclosamide was found to significantly increase wave I amplitudes from 8-32 kHz as compared to cisplatin-only treated mice (n=8 per group, \*\*P<0.01, \*\*\*P<0.001, \*\*\*\*P<0.0001 versus cisplatin treatment, One Way ANOVA). Data shown as mean  $\pm$  SD.
